# Supplementary material for: Characterization of demographic data, clinical signs, comorbidities, and outcomes according to the race in hospitalized individuals with COVID-19 in Brazil: An observational study
Source: PubMed Central journal article supplement (PMC9309002; doi:10.7189/jogh.12.05027), 2022-07-25
Supplement: jogh-12-05027-s001.pdf [file jogh-12-05027-s001.pdf]

**Title:** Characterization of Demographic Data, Clinical Signs, Comorbidities, and Outcomes according to the Race in Hospitalized Individuals with COVID-19 in Brazil: An Observational Study

**Authors:** Nathália Mariana Santos Sansone; Matheus Negri Boschiero; Felipe Eduardo Valencise; Camila Vantini Capasso Palamim; Fernando Augusto Lima Marson

We retrieved the individuals' data from the Brazilian Ministry of Health (<https://opendatasus.saude.gov.br/>) platform and corresponded to one year of the Coronavirus Pandemic (COVID)-19 pandemic (from February 22, 2020, to April 04, 2021) in Brazil.

Distribution of the individuals infected by the SARS-CoV-2 during the first year of the COVID-19 pandemic in Brazil

**Table S1.** Epidemiological week of the notification of severe acute respiratory syndrome (SARS) cases due to SARS-CoV-2 infection (Coronavirus Disease (COVID)-19).

| <b>Week of notification</b> | <b>Death</b> | <b>Clinical recovery</b> | <b>Total</b>  |
|-----------------------------|--------------|--------------------------|---------------|
| 8                           | 0 (0.0%)     | 2 (0.0%)                 | 2 (0.0%)      |
| 9                           | 0 (0.0%)     | 4 (0.0%)                 | 4 (0.0%)      |
| 10                          | 0 (0.0%)     | 9 (0.0%)                 | 9 (0.0%)      |
| 11                          | 6 (0.0%)     | 26 (0.0%)                | 32 (0.0%)     |
| 12                          | 165 (0.1%)   | 294 (0.1%)               | 459 (0.1%)    |
| 13                          | 588 (0.3%)   | 1,087 (0.3%)             | 1,675 (0.3%)  |
| 14                          | 980 (0.4%)   | 2,020 (0.6%)             | 3,000 (0.5%)  |
| 15                          | 1,199 (0.5%) | 1,951 (0.5%)             | 3,150 (0.5%)  |
| 16                          | 1,788 (0.8%) | 2,614 (0.7%)             | 4,402 (0.8%)  |
| 17                          | 2,547 (1.2%) | 3,482 (1.0%)             | 6,029 (1.0%)  |
| 18                          | 3,105 (1.4%) | 4,607 (1.3%)             | 7,712 (1.3%)  |
| 19                          | 3,944 (1.8%) | 5,162 (1.4%)             | 9,106 (1.6%)  |
| 20                          | 4,270 (1.9%) | 6,068 (1.7%)             | 10,338 (1.8%) |
| 21                          | 4,476 (2.0%) | 6,838 (1.9%)             | 11,314 (1.9%) |
| 22                          | 4,252 (1.9%) | 6,798 (1.9%)             | 11,050 (1.9%) |
| 23                          | 4,113 (1.9%) | 6,673 (1.8%)             | 10,786 (1.8%) |
| 24                          | 4,314 (2.0%) | 7,047 (1.9%)             | 11,361 (1.9%) |
| 25                          | 4,546 (2.1%) | 8,156 (2.2%)             | 12,702 (2.2%) |
| 26                          | 4,485 (2.0%) | 8,282 (2.3%)             | 12,766 (2.2%) |
| 27                          | 4,557 (2.1%) | 8,513 (2.3%)             | 13,070 (2.2%) |
| 28                          | 4,883 (2.2%) | 9,235 (2.5%)             | 14,118 (2.4%) |
| 29                          | 4,984 (2.3%) | 9,103 (2.5%)             | 14,087 (2.4%) |
| 30                          | 4,938 (2.3%) | 9,417 (2.6%)             | 14,355 (2.5%) |
| 31                          | 4,771 (2.2%) | 8,785 (2.4%)             | 13,556 (2.3%) |
| 32                          | 4,410 (2.0%) | 8,098 (2.2%)             | 12,508 (2.1%) |
| 33                          | 4,233 (1.9%) | 7,874 (2.1%)             | 12,107 (2.1%) |
| 34                          | 4,038 (1.8%) | 7,597 (2.1%)             | 11,635 (2.0%) |
| 35                          | 3,759 (1.7%) | 7,517 (2.1%)             | 11,276 (1.9%) |
| 36                          | 3,408 (1.6%) | 7,069 (1.9%)             | 10,477 (1.8%) |
| 37                          | 3,185 (1.5%) | 6,941 (1.8%)             | 9,676 (1.7%)  |
| 38                          | 2,921 (1.3%) | 6,174 (1.7%)             | 9,095 (1.6%)  |
| 39                          | 2,684 (1.2%) | 5,513 (1.5%)             | 8,197 (1.4%)  |
| 40                          | 2,568 (1.2%) | 5,456 (1.5%)             | 8,024 (1.4%)  |
| 41                          | 2,306 (1.1%) | 4,827 (1.3%)             | 7,133 (1.2%)  |
| 42                          | 2,043 (0.9%) | 4,425 (1.2%)             | 6,468 (1.1%)  |
| 43                          | 1,942 (0.9%) | 4,472 (1.3%)             | 6,414 (1.1%)  |
| 44                          | 1,819 (0.8%) | 4,498 (1.2%)             | 6,317 (1.1%)  |
| 45                          | 1,992 (0.9%) | 4,313 (1.2%)             | 6,305 (1.1%)  |
| 46                          | 2,345 (1.1%) | 5,238 (1.4%)             | 7,593 (1.3%)  |
| 47                          | 2,862 (1.3%) | 6,697 (1.8%)             | 9,559 (1.6%)  |
| 48                          | 3,486 (1.6%) | 7,664 (2.1%)             | 11,150 (1.9%) |
| 49                          | 3,970 (1.8%) | 8,284 (2.3%)             | 12,254 (2.2%) |
| 50                          | 4,238 (1.9%) | 8,444 (2.3%)             | 12,682 (2.2%) |
| 51                          | 4,104 (1.9%) | 8,025 (2.2%)             | 12,129 (2.1%) |
| 52                          | 3,676 (1.7%) | 6,976 (1.9%)             | 10,652 (1.8%) |
| 53                          | 4,114 (1.9%) | 7,574 (2.1%)             | 11,688 (2.0%) |
| 54                          | 5,256 (2.4%) | 9,182 (2.5%)             | 14,438 (2.5%) |
| 55                          | 5,450 (2.5%) | 9,195 (2.5%)             | 14,645 (2.5%) |
| 56                          | 4,938 (2.3%) | 8,519 (2.3%)             | 13,457 (2.3%) |
| 57                          | 4,647 (2.1%) | 7,423 (2.0%)             | 12,070 (2.1%) |

|       |                |                |                |
|-------|----------------|----------------|----------------|
| 58    | 4,685 (2.1%)   | 7,555 (2.1%)   | 12,240 (2.1%)  |
| 59    | 4,769 (2.2%)   | 7,511 (2.0%)   | 12,280 (2.1%)  |
| 60    | 5,367 (2.4%)   | 8,243 (2.2%)   | 13,610 (2.3%)  |
| 61    | 7,131 (3.3%)   | 10,119 (2.8%)  | 17,250 (2.9%)  |
| 62    | 8,995 (4.1%)   | 10,812 (2.9%)  | 19,807 (3.4%)  |
| 63    | 10,011 (4.6%)  | 10,987 (3.0%)  | 20,998 (3.6%)  |
| 64    | 9,505 (4.3%)   | 9,882 (2.7%)   | 19,387 (3.3%)  |
| 65    | 6,629 (3.0%)   | 6,058 (1.7%)   | 12,687 (2.2%)  |
| 66    | 2,696 (1.2%)   | 1,591 (0.4%)   | 4,287 (0.7%)   |
| 67    | 46 (0.0%)      | 31 (0.0%)      | 77 (0.0%)      |
| Total | 219,138 (100%) | 366,517 (100%) | 585,655 (100%) |

SARS-CoV-2, severe acute respiratory syndrome 2.

We obtained the data for the first 67 epidemiological weeks of the COVID-19 pandemic in Brazil (from February 22, 2020, to April 04, 2021). We obtained the data at OpenDataSUS (<https://opendatasus.saude.gov.br/>).

We presented the data as the number of individuals (N) and the percentage (%).

**Table S2.** Epidemiological week of the first clinical symptom related to the severe acute respiratory syndrome (SARS) due to SARS-CoV-2 (Coronavirus Disease (COVID)-19) infection.

| <b>Week of the first clinical symptom</b> | <b>Death</b>  | <b>Clinical recovery</b> | <b>Total</b>  |
|-------------------------------------------|---------------|--------------------------|---------------|
| 8                                         | 12 (0.0%)     | 20 (0.0%)                | 32 (0.0%)     |
| 9                                         | 11 (0.0%)     | 2 (0.0%)                 | 37 (0.0%)     |
| 10                                        | 48 (0.0%)     | 87 (0.0%)                | 135 (0.0%)    |
| 11                                        | 174 (0.1%)    | 385 (0.1%)               | 559 (0.1%)    |
| 12                                        | 612 (0.3%)    | 1,263 (0.3%)             | 1875 (0.3%)   |
| 13                                        | 952 (0.4%)    | 1,851 (0.5%)             | 2,803 (0.5%)  |
| 14                                        | 1,422 (0.6%)  | 2,166 (0.6%)             | 3,588 (0.6%)  |
| 15                                        | 1,940 (0.9%)  | 2,794 (0.8%)             | 4,734 (0.8%)  |
| 16                                        | 2,727 (1.2%)  | 3,824 (1.0%)             | 6,551 (1.1%)  |
| 17                                        | 35,543 (1.6%) | 4,986 (1.4%)             | 8,529 (1.5%)  |
| 18                                        | 4,552 (2.1%)  | 5,840 (1.6%)             | 10,392 (1.8%) |
| 19                                        | 4,630 (2.1%)  | 6,307 (1.7%)             | 10,937 (1.9%) |
| 20                                        | 4,961 (2.3%)  | 7,396 (2.0%)             | 12,357 (2.1%) |
| 21                                        | 4,369 (2.0%)  | 7,001 (1.9%)             | 11,370 (1.9%) |
| 22                                        | 4,016 (1.8%)  | 6,584 (1.8%)             | 10,600 (1.8%) |
| 23                                        | 4,555 (2.1%)  | 7,824 (2.1%)             | 12,379 (2.1%) |
| 24                                        | 4,282 (2.0%)  | 8,120 (2.2%)             | 12,402 (2.1%) |
| 25                                        | 4,625 (2.1%)  | 9,005 (2.5%)             | 13,630 (2.3%) |
| 26                                        | 4,235 (1.9%)  | 8,105 (2.2%)             | 12,340 (2.1%) |
| 27                                        | 5,048 (2.3%)  | 9,440 (2.6%)             | 14,488 (2.5%) |
| 28                                        | 5,231 (2.4%)  | 9,474 (2.6%)             | 14,704 (2.5%) |
| 29                                        | 4,771 (2.2%)  | 8,897 (2.4%)             | 13,668 (2.3%) |
| 30                                        | 4,773 (2.2%)  | 8,645 (2.4%)             | 13,418 (2.3%) |
| 31                                        | 4,411 (2.0%)  | 8,173 (2.2%)             | 12,584 (2.1%) |
| 32                                        | 3,932 (1.8%)  | 7,523 (2.1%)             | 11,455 (2.0%) |
| 33                                        | 4,013 (1.8%)  | 7,722 (2.1%)             | 11,735 (2.0%) |
| 34                                        | 3,527 (1.6%)  | 7,247 (2.0%)             | 10,774 (1.8%) |
| 35                                        | 3,134 (1.4%)  | 6,573 (1.8%)             | 9,707 (1.7%)  |
| 36                                        | 3,210 (1.5%)  | 6,479 (1.8%)             | 9,689 (1.7%)  |
| 37                                        | 2,796 (1.3%)  | 5,892 (1.6%)             | 8,688 (1.5%)  |
| 38                                        | 2,534 (1.2%)  | 5,296 (1.4%)             | 7,830 (1.3%)  |
| 39                                        | 2,353 (1.1%)  | 5,160 (1.4%)             | 7,513 (1.3%)  |
| 40                                        | 2,322 (1.1%)  | 4,766 (1.3%)             | 7,088 (1.2%)  |
| 41                                        | 2,075 (0.9%)  | 4,597 (1.2%)             | 6,672 (1.1%)  |
| 42                                        | 1,734 (0.8%)  | 4,244 (1.2%)             | 5,978 (1.0%)  |
| 43                                        | 1,879 (0.9%)  | 4,364 (1.2%)             | 6,243 (1.1%)  |
| 44                                        | 1,872 (0.9%)  | 4,383 (1.2%)             | 6,255 (1.1%)  |
| 45                                        | 2,448 (1.1%)  | 5,918 (1.6%)             | 8,366 (1.4%)  |
| 46                                        | 2,989 (1.4%)  | 6,939 (1.9%)             | 9,928 (1.7%)  |
| 47                                        | 3,694 (1.7%)  | 8,102 (2.2%)             | 11,796 (2.0%) |
| 48                                        | 3,871 (1.8%)  | 8,165 (2.2%)             | 12,036 (2.0%) |
| 49                                        | 4,596 (2.1%)  | 8,691 (2.4%)             | 13,287 (2.3%) |
| 50                                        | 4,229 (1.9%)  | 7,859 (2.1%)             | 12,088 (2.1%) |
| 51                                        | 3,955 (1.8%)  | 7,265 (2.0%)             | 11,220 (1.9%) |
| 52                                        | 4,501 (2.1%)  | 8,092 (2.2%)             | 12,593 (2.2%) |
| 53                                        | 5,395 (2.5%)  | 9,152 (2.5%)             | 14,547 (2.5%) |
| 54                                        | 5,437 (2.5%)  | 9,145 (2.5%)             | 14,582 (2.5%) |
| 55                                        | 5,254 (2.4%)  | 8,300 (2.3%)             | 13,554 (2.4%) |
| 56                                        | 4,562 (2.1%)  | 7,514 (2.1%)             | 12,076 (2.1%) |
| 57                                        | 4,067 (1.9%)  | 6,915 (1.9%)             | 10,982 (1.9%) |
| 58                                        | 5,114 (2.3%)  | 7,975 (2.2%)             | 13,089 (2.2%) |
| 59                                        | 5,797 (2.6%)  | 8,848 (2.4%)             | 14,645 (2.5%) |
| 60                                        | 7,932 (3.6%)  | 10,611 (2.9%)            | 18,543 (3.2%) |
| 61                                        | 8,602 (3.9%)  | 10,381 (2.8%)            | 18,983 (3.2%) |

|       |                |                |                |
|-------|----------------|----------------|----------------|
| 62    | 10,878 (5.0%)  | 11,586 (3.2%)  | 22,464 (3.8%)  |
| 63    | 8,418 (3.8%)   | 8,132 (2.2%)   | 16,550 (2.8%)  |
| 64    | 4,774 (2.2%)   | 3,734 (1.0%)   | 8,508 (1.5%)   |
| 65    | 1,237 (0.6%)   | 696 (0.2%)     | 1,933 (0.35)   |
| 66    | 107 (0.0%)     | 39 (0.0%)      | 146 (0.0%)     |
| Total | 219,138 (100%) | 366,517 (100%) | 585,655 (100%) |

SARS-CoV-2, severe acute respiratory syndrome 2.

We obtained the data for the first 67 epidemiological weeks of the COVID-19 pandemic in Brazil (from February 22, 2020, to April 04, 2021). We obtained the data at OpenDataSUS (<https://opendatasus.saude.gov.br/>).

We presented the data as the number of individuals (N) and the percentage (%).

**Table S3.** Number and percentage of individuals with Coronavirus Disease (COVID)-19 in the Brazilian states and Federal District.

| <b>State</b>        | <b>N</b>       | <b>%</b>   |
|---------------------|----------------|------------|
| Acre                | 627            | 0.1        |
| Alagoas             | 4,504          | 0.8        |
| Amazonas            | 20,843         | 3.6        |
| Amapá               | 2,687          | 0.5        |
| Bahia               | 19,656         | 3.4        |
| Ceará               | 16,680         | 2.8        |
| Federal District    | 8,560          | 1.5        |
| Espírito Santo      | 3,387          | 0.6        |
| Goiás               | 20,116         | 3.4        |
| Maranhão            | 4,349          | 0.7        |
| Minas Gerais        | 58,797         | 10.0       |
| Mato Grosso do Sul  | 10,769         | 1.8        |
| Mato Grosso         | 12,133         | 2.1        |
| Pará                | 18,201         | 3.1        |
| Paraíba             | 10,776         | 1.8        |
| Pernambuco          | 8,360          | 1.4        |
| Piauí               | 6,495          | 1.1        |
| Paraná              | 38,289         | 6.5        |
| Rio de Janeiro      | 37,082         | 6.3        |
| Rio Grande do Norte | 6,196          | 1.1        |
| Rondônia            | 5,322          | 0.9        |
| Roraima             | 1,700          | 0.3        |
| Rio Grande do Sul   | 50,404         | 8.6        |
| Santa Catarina      | 27,833         | 4.8        |
| Sergipe             | 3,434          | 0.6        |
| São Paulo           | 185,380        | 31.7       |
| Tocantins           | 3,075          | 0.5        |
| <b>Total</b>        | <b>585,655</b> | <b>100</b> |

We presented the data as the number of individuals (N) and the percentage (%).

Association of the outcome and the patients' characteristics with the SARS-CoV-2 infection during the first year of the COVID-19 pandemic in Brazil – All individuals

**Table S4.** Association between the case fatality rate due to SARS-CoV-2 infection in hospitalized Brazilian individuals' regarding to the demographic data.

| Data                                 | Category           | Death           | Clinical recovery | Total           | P      | OR     | 95%CI         |
|--------------------------------------|--------------------|-----------------|-------------------|-----------------|--------|--------|---------------|
| Sex                                  | Male               | 123,726 (56.2%) | 200,484 (54.7%)   | 324,210 (55.4%) | <0.001 | 1.074  | 1.063-1.085   |
|                                      | Female             | 95,412 (43.5%)  | 166,033 (45.3%)   | 261,445 (44.6%) |        | 1      | Reference     |
| Age                                  | <1-year-old        | 328 (0.1%)      | 2,505 (0.7%)      | 2,833 (0.5%)    | -      | 1      | Reference     |
|                                      | 1 to 12 years old  | 285 (0.1%)      | 5,091 (1.4%)      | 5,376 (0.9%)    | <0.001 | 0.428  | 0.362-0.505   |
|                                      | 13 to 24 years old | 1,256 (0.6%)    | 9,391 (2.6%)      | 10,647 (1.8%)   | 0.748  | 1.021  | 0.898-1.162   |
|                                      | 25 to 60 years old | 58,192 (26.6%)  | 203,331 (55.5%)   | 261,523 (44.7%) | <0.001 | 2.186  | 1.947-2.453   |
|                                      | 61 to 72 years old | 65,072 (29.7%)  | 83,437 (22.8%)    | 148,509 (25.4%) | <0.001 | 5.956  | 5.306-6.686   |
|                                      | 73 to 85 years old | 68,125 (31.1%)  | 50,532 (13.8%)    | 118,657 (20.3%) | <0.001 | 10.300 | 9.172-11.560  |
|                                      | +85 years old      | 25,880 (11.8%)  | 12,230 (3.3%)     | 38,110 (6.5%)   | <0.001 | 16.160 | 14.380-18.170 |
| Place of residence                   | Urban              | 207,431 (94.7%) | 350,140 (95.5%)   | 557,571 (95.2%) | -      | 1      | Reference     |
|                                      | Rural              | 10,941 (5.0%)   | 15,274 (4.2%)     | 26,215 (4.5%)   | <0.001 | 1.209  | 1.179-1.240   |
|                                      | Peri-urban         | 766 (0.3%)      | 1,103 (0.3%)      | 1,869 (0.3%)    | <0.001 | 1.172  | 1.069-1.286   |
| Lived in a place with a Flu outbreak | Yes                | 47,075 (21.5%)  | 74,004 (20.2%)    | 121,079 (20.7%) | <0.001 | 1.081  | 1.067-1.096   |
|                                      | No                 | 172,063 (78.5%) | 292,513 (79.8%)   | 464,576 (79.3%) |        | 1      | Reference     |
| Nosocomial infection                 | Yes                | 6,339 (2.9%)    | 4,952 (1.4%)      | 11,291 (1.9%)   | <0.001 | 2.175  | 2.095-2.258   |
|                                      | No                 | 212,799 (97.1%) | 361,565 (98.6%)   | 574,364 (98.1%) |        | 1      | Reference     |

SARS-CoV-2, severe acute respiratory syndrome 2; OR, odds ratio; 95%CI, 95% confidence interval.

We presented the data as the number of individuals (N) and the percentage (%).

We performed the statistical analysis using the  $\chi^2$  test. Alpha=0.05.

**Table S5.** Association between the case fatality rate due to SARS-CoV-2 infection in hospitalized Brazilian individuals' regarding to the clinical symptoms.

| <b>Data</b>            | <b>Category</b> | <b>Death</b>    | <b>Clinical recovery</b> | <b>Total</b>    | <b>P</b> | <b>OR</b> | <b>95%CI</b> |
|------------------------|-----------------|-----------------|--------------------------|-----------------|----------|-----------|--------------|
| Fever                  | Yes             | 151,047 (68.9%) | 261,036 (71.2%)          | 412,083 (70.4%) | <0.001   | 0.896     | 0.886-0.907  |
|                        | No              | 68,091 (31.1%)  | 105,481 (28.8%)          | 173,572 (29.6%) |          | 1         | Reference    |
| Cough                  | Yes             | 169,018 (77.1%) | 294,458 (80.3%)          | 463,476 (79.1%) | <0.001   | 0.825     | 0.882-0.896  |
|                        | No              | 50,120 (22.9%)  | 72,059 (19.7%)           | 122,179 (20.9%) |          | 1         | Reference    |
| Sore throat            | Yes             | 61,844 (28.2%)  | 116,774 (31.9%)          | 178,618 (30.5%) | <0.001   | 0.841     | 0.831-0.851  |
|                        | No              | 157,294 (71.8%) | 249,743 (68.1%)          | 407,037 (69.5%) |          | 1         | Reference    |
| Dyspnea                | Yes             | 191,239 (87.3%) | 280,720 (76.6%)          | 471,959 (80.6%) | <0.001   | 2.095     | 2.064-2.126  |
|                        | No              | 27,899 (12.7%)  | 85,797 (23.4%)           | 113,696 (19.4%) |          | 1         | Reference    |
| Respiratory discomfort | Yes             | 177,402 (81.0%) | 250,292 (68.3%)          | 427,694 (73.0%) | <0.001   | 1.974     | 1.949-1.999  |
|                        | No              | 41,736 (19.0%)  | 116,225 (31.7%)          | 157,961 (27.0%) |          | 1         | Reference    |
| Oxygen saturation      | <95%            | 184,813 (84.3%) | 242,339 (66.1%)          | 427,152 (72.9%) | <0.001   | 2.759     | 2.722-2.796  |
|                        | ≥95%            | 34,325 (15.7%)  | 124,178 (33.9%)          | 158,503 (27.1%) |          | 1         | Reference    |
| Diarrhea               | Yes             | 55,163 (25.2%)  | 100,222 (27.3%)          | 155,385 (26.5%) | <0.001   | 0.894     | 0.883-0.905  |
|                        | No              | 163,975 (74.8%) | 266,295 (72.7%)          | 430,270 (73.5%) |          | 1         | Reference    |
| Vomit                  | Yes             | 42,717 (19.5%)  | 75,553 (20.6%)           | 118,270 (20.2%) | <0.001   | 0.933     | 0.920-0.945  |
|                        | No              | 176,421 (80.5%) | 290,964 (79.4%)          | 467,385 (79.8%) |          | 1         | Reference    |
| Abdominal pain         | Yes             | 39,736 (18.1%)  | 65,162 (17.8%)           | 104,898 (17.9%) | 0.001    | 1.024     | 1.010-1.039  |
|                        | No              | 179,402 (81.9%) | 301,355 (82.2%)          | 470,757 (82.1%) |          | 1         | Reference    |
| Fatigue                | Yes             | 82,335 (37.6%)  | 130,578 (35.6%)          | 212,913 (36.4%) | <0.001   | 1.087     | 1.076-1.099  |
|                        | No              | 136,803 (62.4%) | 235,939 (64.4%)          | 372,742 (63.6%) |          | 1         | Reference    |
| Loss of smell          | Yes             | 49,018 (22.4%)  | 95,545 (26.1%)           | 144,563 (24.7%) | <0.001   | 0.817     | 0.807-0.827  |
|                        | No              | 170,120 (77.6%) | 270,972 (73.9%)          | 441,092 (76.3%) |          | 1         | Reference    |
| Loss of taste          | Yes             | 48,240 (22.5%)  | 96,988 (26.5%)           | 146,228 (25.0%) | <0.001   | 0.805     | 0.796-0.816  |
|                        | No              | 169,898 (77.5%) | 269,529 (73.5%)          | 439,427 (75.0%) |          | 1         | Reference    |
| Other symptoms         | Yes             | 90,358 (41.2%)  | 174,492 (47.6%)          | 264,850 (45.2%) | <0.001   | 0.772     | 0.764-0.780  |
|                        | No              | 128,780 (58.8%) | 192,025 (52.4%)          | 320,805 (54.8%) |          | 1         | Reference    |

SARS-CoV-2, severe acute respiratory syndrome 2; OR, odds ratio; 95%CI, 95% confidence interval.

We presented the data as the number of individuals (N) and the percentage (%).

We performed the statistical data analysis using the  $\chi^2$  test. Alpha=0.05.

**Table S6.** Association between the case fatality rate due to SARS-CoV-2 infection in hospitalized Brazilian individuals' regarding to the comorbidities.

| Data                        | Category | Death           | Clinical recovery | Total           | P      | OR    | 95%CI       |
|-----------------------------|----------|-----------------|-------------------|-----------------|--------|-------|-------------|
| Comorbidities (any)         | Yes      | 171,508 (78.3%) | 218,235 (59.5%)   | 389,743 (66.5%) | <0.001 | 2.447 | 2.417-2.476 |
|                             | No       | 47,630 (21.7%)  | 148,282 (40.5%)   | 195,912 (33.5%) |        | 1     | Reference   |
| Cardiopathy                 | Yes      | 123,420 (56.3%) | 139,945 (38.2%)   | 263,365 (45.0%) | <0.001 | 2.088 | 2.065-2.110 |
|                             | No       | 95,718 (43.7%)  | 226,572 (61.8%)   | 322,290 (55.0%) |        | 1     | Reference   |
| Hematologic disorder        | Yes      | 2,883 (1.3%)    | 3,173 (0.9%)      | 6,056 (1.0%)    | <0.001 | 1.527 | 1.451-1.606 |
|                             | No       | 216,255 (98.7%) | 363,344 (99.1%)   | 579,599 (99.0%) |        | 1     | Reference   |
| Down syndrome               | Yes      | 782 (0.4%)      | 950 (0.3%)        | 1,732 (0.3%)    | <0.001 | 1.378 | 1.253-1.515 |
|                             | No       | 218,356 (99.6%) | 365,567 (99.7%)   | 583,923 (99.7%) |        | 1     | Reference   |
| Hepatic disorder            | Yes      | 3,947 (1.8%)    | 4,585 (1.3%)      | 8,532 (1.5%)    | <0.001 | 1.448 | 1.387-1.511 |
|                             | No       | 215,191 (98.2%) | 361,932 (98.7%)   | 577,123 (98.5%) |        | 1     | Reference   |
| Asthma                      | Yes      | 15,215 (6.9%)   | 31,119 (8.5%)     | 46,334 (7.9%)   | <0.001 | 0.804 | 0.788-0.821 |
|                             | No       | 203,923 (93.1%) | 335,398 (91.5%)   | 539,321 (92.1%) |        | 1     | Reference   |
| Diabetes mellitus           | Yes      | 105,109 (48.0%) | 113,649 (31.0%)   | 218,758 (37.4%) | <0.001 | 2.051 | 2.029-2.073 |
|                             | No       | 114,029 (52.0%) | 252,868 (69.0%)   | 366,897 (62.6%) |        | 1     | Reference   |
| Neurological disorder       | Yes      | 27,045 (12.3%)  | 33,609 (9.2%)     | 60,654 (10.4%)  | <0.001 | 1.395 | 1.371-1.418 |
|                             | No       | 192,093 (87.7%) | 332,908 (90.8%)   | 525,001 (89.6%) |        | 1     | Reference   |
| Chronic respiratory disease | Yes      | 28,220 (12.9%)  | 37,073 (10.1%)    | 65,293 (11.1%)  | <0.001 | 1.314 | 1.292-1.335 |
|                             | No       | 190,918 (87.1%) | 329,444 (89.9%)   | 520,362 (88.9%) |        | 1     | Reference   |
| Immunosuppressive disorder  | Yes      | 18,145 (8.3%)   | 27,507 (7.5%)     | 45,652 (7.8%)   | <0.001 | 1.113 | 1.091-1.135 |
|                             | No       | 200,993 (91.7%) | 339,010 (92.5%)   | 540,003 (92.2%) |        | 1     | Reference   |
| Renal disease               | Yes      | 29,584 (13.5%)  | 38,083 (10.4%)    | 67,667 (11.6%)  | <0.001 | 1.346 | 1.324-1.368 |
|                             | No       | 189,554 (86.5%) | 328,434 (89.6%)   | 517,988 (88.4%) |        | 1     | Reference   |
| Obesity                     | Yes      | 47,373 (21.6%)  | 63,846 (17.4%)    | 111,219 (19.0%) | <0.001 | 1.307 | 1.290-1.325 |
|                             | No       | 171,765 (78.4%) | 302,671 (82.6%)   | 474,436 (81.0%) |        | 1     | Reference   |
| Other comorbidities         | Yes      | 112,579 (51.4%) | 124,260 (33.9%)   | 236,839 (40.4%) | <0.001 | 2.060 | 2.038-2.082 |
|                             | No       | 106,559 (48.6%) | 242,257 (66.1%)   | 348,816 (59.6%) |        | 1     | Reference   |

SARS-CoV-2, severe acute respiratory syndrome 2; OR, odds ratio; 95%CI, 95% confidence interval.

We presented the data as the number of individuals (N) and the percentage (%).

We performed the statistical analysis using the  $\chi^2$  test. Alpha=0.05.



**Table S7.** Association between the case fatality rate due to SARS-CoV-2 infection in hospitalized Brazilian individuals' regarding to the antiviral drugs used to treat the infection and the hospitalization data.

| <b>Data</b>                            | <b>Category</b>        | <b>Death</b>    | <b>Clinical recovery</b> | <b>Total</b>    | <b>P</b> | <b>OR</b> | <b>95%CI</b>  |
|----------------------------------------|------------------------|-----------------|--------------------------|-----------------|----------|-----------|---------------|
| Antiviral drugs to treat the infection | Yes                    | 27,665 (12.6%)  | 50,488 (13.8%)           | 78,153 (13.3%)  | <0.001   | 0.904     | 0.890-0.919   |
|                                        | No                     | 191,473 (87.4%) | 316,029 (86.2%)          | 507,502 (86.7%) |          | 1         | Reference     |
| Need for intensive care unit           | Yes                    | 131,870 (60.2%) | 80,197 (21.9%)           | 212,067 (36.2%) | <0.001   | 5.395     | 5.333-5.458   |
|                                        | No                     | 87,268 (39.8%)  | 286,320 (78.1%)          | 373,588 (63.8%) |          | 1         | Reference     |
| Need for ventilatory support           | Invasive               | 103,478 (47.2%) | 23,041 (6.3%)            | 126,519 (21.6%) | <0.001   | 22.850    | 22.400-23.310 |
|                                        | Non-invasive           | 82,484 (42.2%)  | 225,548 (61.5%)          | 318,032 (54.3%) |          | 2.086     | 2.053-2.120   |
|                                        | None required          | 23,176 (10.6%)  | 117,928 (32.2%)          | 141,104 (24.1%) |          | 1         | Reference     |
| Discharge criterion                    | Laboratorial criterion | 204,029 (93.1%) | 344,571 (94.0%)          | 548,600 (93.7%) | <0.001   | 1         | Reference     |
|                                        | Clinical criterion     | 15,109 (6.9%)   | 21,946 (6.0%)            | 37,055 (6.3%)   |          | 1.163     | 1.138-1.188   |

SARS-CoV-2, severe acute respiratory syndrome 2; OR, odds ratio; 95%CI, 95% confidence interval.

We presented the data as the number of individuals (N) and the percentage (%).

We performed the statistical analysis using the  $\chi^2$  test. Alpha=0.05.

Association of the outcome and the patients' characteristics with the SARS-CoV-2 infection during the first year of the COVID-19 pandemic in Brazil – White individuals

**Table S8.** Association between the case fatality rate due to SARS-CoV-2 infection in hospitalized Brazilian individuals' regarding to the demographic data.

| <b>Data</b>                          | <b>Category</b>    | <b>Death</b>    | <b>Clinical recovery</b> | <b>Total</b>    | <b>P</b> | <b>OR</b> | <b>95%CI</b> |               |
|--------------------------------------|--------------------|-----------------|--------------------------|-----------------|----------|-----------|--------------|---------------|
| Sex                                  | Male               | 61,438 (55.6%)  | 108,097 (54.3%)          | 169,535 (54.8%) | <0.001   | 1.055     | 1.039-1.071  |               |
|                                      | Female             | 49,057 (44.4%)  | 91,054 (45.7%)           | 140,111 (45.2%) |          | 1         | Reference    |               |
| Age                                  | <1-year-old        | 88 (0.1%)       | 956 (0.5%)               | 1,044 (0.3%)    | <0.001   | 1         | Reference    |               |
|                                      | 1 to 12 years old  | 89 (0.1%)       | 1,714 (0.9%)             | 1,803 (0.6%)    |          | 0.564     | 0.416-0.765  |               |
|                                      | 13 to 24 years old | 452 (0.4%)      | 3,940 (2.0%)             | 4,392 (1.4%)    |          | 0.080     | 1.246        | 0.981-1.583   |
|                                      | 25 to 60 years old | 25,939 (23.5%)  | 108,560 (54.5%)          | 134,499 (43.4%) |          | <0.001    | 2.596        | 2.086-3.230   |
|                                      | 61 to 72 years old | 32,652 (29.6%)  | 47,211 (23.7%)           | 79,862 (25.8%)  |          | <0.001    | 7.513        | 6.037-9.351   |
|                                      | 73 to 85 years old | 36,352 (32.9%)  | 29,340 (14.7%)           | 65,682 (21.2%)  |          | <0.001    | 13.510       | 10.850-16.820 |
|                                      | +85 years old      | 14,823 (13.5%)  | 7,430 (3.7%)             | 22,353 (7.2%)   |          | <0.001    | 21.820       | 17.510-27.190 |
| Place of residence                   | Urban              | 106,178 (96.1%) | 191,967 (96.4%)          | 298,145 (96.3%) | <0.001   | 1         | Reference    |               |
|                                      | Rural              | 3,988 (3.6%)    | 6,603 (3.3%)             | 10,591 (3.4%)   |          | 1.092     | 1.049-1.137  |               |
|                                      | Peri-urban         | 329 (0.3%)      | 581 (0.3%)               | 910 (0.3%)      |          | 0.760     | 1.024        | 0.894-1.172   |
| Lived in a place with a Flu outbreak | Yes                | 18,676 (16.9%)  | 33,710 (16.7%)           | 52,386 (16.9%)  | 0.860    | 0.998     | 0.979-1.018  |               |
|                                      | No                 | 91,819 (83.1%)  | 16,5441 (83.1%)          | 257,260 (83.1%) |          | 1         | Reference    |               |
| Nosocomial infection                 | Yes                | 3,390 (3.1%)    | 2,512 (1.3%)             | 5,902 (1.9%)    | <0.001   | 2.478     | 2.352-2.610  |               |
|                                      | No                 | 107,105 (96.9%) | 196,639 (98.7%)          | 303,744 (98.1%) |          | 1         | Reference    |               |

SARS-CoV-2, severe acute respiratory syndrome 2; OR, odds ratio; 95%CI, 95% confidence interval.

We presented the data as the number of individuals (N) and the percentage (%).

We performed the statistical analysis using the  $\chi^2$  test. Alpha=0.05.

**Table S9.** Association between the case fatality rate due to SARS-CoV-2 infection in hospitalized Brazilian individuals' regarding to the clinical symptoms.

| Data                   | Category | Death          | Clinical recovery | Total           | P      | OR    | 95%CI       |
|------------------------|----------|----------------|-------------------|-----------------|--------|-------|-------------|
| Fever                  | Yes      | 73,269 (66.3%) | 138,318 (69.5%)   | 211,587 (68.3%) | <0.001 | 0.866 | 0.852-0.879 |
|                        | No       | 37,226 (33.7%) | 60,833 (30.5%)    | 98,056 (31.7%)  |        | 1     | Reference   |
| Cough                  | Yes      | 83,642 (75.7%) | 158,449 (79.6%)   | 242,091 (78.2%) | <0.001 | 0.800 | 0.786-0.814 |
|                        | No       | 26,853 (24.3%) | 40,702 (20.4%)    | 67,555 (21.8%)  |        | 1     | Reference   |
| Sore throat            | Yes      | 30,366 (27.5%) | 62,576 (31.4%)    | 92,942 (30.0%)  | <0.001 | 0.827 | 0.814-0.841 |
|                        | No       | 80,129 (72.5%) | 136,575 (68.6%)   | 216,704 (70.0%) |        | 1     | Reference   |
| Dyspnea                | Yes      | 95,636 (86.6%) | 151,969 (76.3%)   | 247,605 (80.0%) | <0.001 | 1.998 | 1.958-2.039 |
|                        | No       | 14,859 (13.4%) | 47,182 (23.7%)    | 62,041 (20.0%)  |        | 1     | Reference   |
| Respiratory discomfort | Yes      | 88,718 (80.3%) | 135,500 (68.0%)   | 224,218 (72.4%) | <0.001 | 1.914 | 1.880-1.948 |
|                        | No       | 21,777 (19.7%) | 63,651 (32.0%)    | 85,428 (27.6%)  |        | 1     | Reference   |
| Oxygen saturation      | <95%     | 94,077 (85.1%) | 135,108 (67.8%)   | 229,185 (74.0%) | <0.001 | 2.716 | 2.665-2.768 |
|                        | ≥95%     | 16,418 (14.9%) | 64,043 (32.2%)    | 80,461 (26.0%)  |        | 1     | Reference   |
| Diarrhea               | Yes      | 28,802 (26.1%) | 56,142 (28.2%)    | 84,944 (27.4%)  | <0.001 | 0.898 | 0.883-0.913 |
|                        | No       | 81,693 (73.9%) | 143,009 (71.8%)   | 224,702 (72.6%) |        | 1     | Reference   |
| Vomit                  | Yes      | 22,135 (20.0%) | 41,335 (20.8%)    | 63,470 (20.5%)  | <0.001 | 0.956 | 0.939-0.974 |
|                        | No       | 88,360 (80.0%) | 157,816 (79.2%)   | 246,176 (79.5%) |        | 1     | Reference   |
| Abdominal pain         | Yes      | 20,676 (18.7%) | 36,322 (18.2%)    | 56,998 (18.4%)  | 0.001  | 1.032 | 1.013-1.052 |
|                        | No       | 89,819 (81.3%) | 162,829 (81.8%)   | 252,648 (81.6%) |        | 1     | Reference   |
| Fatigue                | Yes      | 44,657 (40.4%) | 77,321 (38.8%)    | 121,978 (39.4%) | <0.001 | 1.069 | 1.053-1.085 |
|                        | No       | 65,838 (59.6%) | 121,830 (61.2%)   | 187,668 (60.6%) |        | 1     | Reference   |
| Loss of smell          | Yes      | 24,929 (22.6%) | 52,082 (26.2%)    | 77,011 (24.9%)  | <0.001 | 0.823 | 0.809-0.837 |
|                        | No       | 85,566 (77.4%) | 147,069 (73.8%)   | 232,635 (75.1%) |        | 1     | Reference   |
| Loss of taste          | Yes      | 25,152 (22.8%) | 53,228 (26.7%)    | 78,380 (25.3%)  | <0.001 | 0.808 | 0.794-0.822 |
|                        | No       | 85,343 (77.2%) | 145,923 (73.3%)   | 231,266 (74.7%) |        | 1     | Reference   |
| Other symptoms         | Yes      | 46,782 (42.3%) | 96,948 (48.7%)    | 143,730 (46.4%) | <0.001 | 0.774 | 0.763-0.786 |
|                        | No       | 63,713 (57.7%) | 102,203 (51.3%)   | 165,916 (53.6%) |        | 1     | Reference   |

SARS-CoV-2, severe acute respiratory syndrome 2; OR, odds ratio; 95%CI, 95% confidence interval.

We presented the data as the number of individuals (N) and the percentage (%).

We performed the statistical data analysis using the  $\chi^2$  test. Alpha=0.05.

**Table S10.** Association between the case fatality rate due to SARS-CoV-2 infection in hospitalized Brazilian individuals' regarding to the comorbidities. – White patients

| <b>Data</b>                 | <b>Category</b> | <b>Death</b>    | <b>Clinical recovery</b> | <b>Total</b>    | <b>P</b> | <b>OR</b> | <b>95%CI</b> |
|-----------------------------|-----------------|-----------------|--------------------------|-----------------|----------|-----------|--------------|
| Comorbidities (any)         | Yes             | 90,266 (81.7%)  | 121,720 (61.1%)          | 211,986 (68.5%) | <0.001   | 2.839     | 2.789-2.889  |
|                             | No              | 20,229 (18.3%)  | 77,431 (38.9%)           | 97,660 (31.5%)  |          | 1         | Reference    |
| Cardiopathy                 | Yes             | 65,673 (59.4%)  | 79,060 (39.7%)           | 144,733 (46.7%) | <0.001   | 2.226     | 2.192-2.259  |
|                             | No              | 44,822 (40.6%)  | 120,091 (60.3%)          | 164,913 (53.3%) |          | 1         | Reference    |
| Hematologic disorder        | Yes             | 1,605 (1.5%)    | 1,719 (0.9%)             | 3,324 (1.1%)    | <0.001   | 1.693     | 1.581-1.813  |
|                             | No              | 108,890 (98.5%) | 197,432 (99.1%)          | 306,322 (98.9%) |          | 1         | Reference    |
| Down syndrome               | Yes             | 398 (0.4%)      | 559 (0.3%)               | 957 (0.3%)      | <0.001   | 1.284     | 1.129-1.461  |
|                             | No              | 110,097 (99.6%) | 198,592 (99.7%)          | 308,689 (99.7%) |          | 1         | Reference    |
| Hepatic disorder            | Yes             | 2,093 (1.9%)    | 2,612 (1.3%)             | 4,705 (1.5%)    | <0.001   | 1.453     | 1.371-1.540  |
|                             | No              | 108,402 (98.1%) | 196,539 (98.7%)          | 304,941 (98.5%) |          | 1         | Reference    |
| Asthma                      | Yes             | 8,579 (7.8%)    | 1,7685 (8.9%)            | 26,264 (8.5%)   | <0.001   | 0.864     | 0.841-0.887  |
|                             | No              | 101,916 (92.2%) | 181,466 (91.1%)          | 283,382 (91.5%) |          | 1         | Reference    |
| Diabetes mellitus           | Yes             | 5,4102 (49.0%)  | 62,504 (31.4%)           | 116,606 (37.7%) | <0.001   | 2.097     | 2.066-2.129  |
|                             | No              | 56,393 (51.0%)  | 136,647 (68.6%)          | 193,040 (62.3%) |          | 1         | Reference    |
| Neurological disorder       | Yes             | 15,915 (14.4%)  | 19,409 (9.7%)            | 35,324 (11.4%)  | <0.001   | 1.558     | 1.524-1.596  |
|                             | No              | 94,580 (85.6%)  | 179,742 (90.3%)          | 274,322 (88.6%) |          | 1         | Reference    |
| Chronic respiratory disease | Yes             | 15,998 (14.5%)  | 21,109 (10.6%)           | 37,107 (12.0%)  | <0.001   | 1.428     | 1.397-1.460  |
|                             | No              | 94,497 (85.5%)  | 178,042 (89.4%)          | 272,539 (88.0%) |          | 1         | Reference    |
| Immunosuppressive disorder  | Yes             | 10,150 (9.2%)   | 15,472 (7.8%)            | 25,622 (8.3%)   | <0.001   | 1.201     | 1.170-1.233  |
|                             | No              | 100,345 (90.8%) | 183,679 (92.2%)          | 284,024 (91.7%) |          | 1         | Reference    |
| Renal disease               | Yes             | 15,647 (14.2%)  | 20,950 (10.5%)           | 36,597 (11.8%)  | <0.001   | 1.403     | 1.372-1.435  |
|                             | No              | 94,848 (95.5%)  | 178,201 (89.5%)          | 273,049 (88.2%) |          | 1         | Reference    |
| Obesity                     | Yes             | 25,711 (23.3%)  | 36,881 (18.5%)           | 62,592 (20.2%)  | <0.001   | 1.334     | 1.311-1.358  |
|                             | No              | 84,784 (76.7%)  | 162,270 (81.5%)          | 247,054 (79.8%) |          | 1         | Reference    |
| Other comorbidities         | Yes             | 58,947 (53.3%)  | 688,23 (34.6%)           | 127,770 (41.3%) | <0.001   | 2.165     | 2.133-2.198  |
|                             | No              | 51,548 (46.7%)  | 130,328 (65.4%)          | 181,876 (58.7%) |          | 1         | Reference    |

SARS-CoV-2, severe acute respiratory syndrome 2; OR, odds ratio; 95%CI, 95% confidence interval.

We presented the data as the number of individuals (N) and the percentage (%).

We performed the statistical analysis using the  $\chi^2$  test. Alpha=0.05.

**Table S11.** Association between the case fatality rate due to SARS-CoV-2 infection in hospitalized Brazilian individuals' regarding to the antiviral drugs used to treat the infection and the hospitalization data.

| <b>Data</b>                            | <b>Category</b>        | <b>Death</b>    | <b>Clinical recovery</b> | <b>Total</b>    | <b>P</b> | <b>OR</b> | <b>95%CI</b>  |
|----------------------------------------|------------------------|-----------------|--------------------------|-----------------|----------|-----------|---------------|
| Antiviral drugs to treat the infection | Yes                    | 13,750 (12.4%)  | 28,718 (14.4%)           | 42,468 (13.7%)  | <0.001   | 0.844     | 0.825-0.862   |
|                                        | No                     | 96,745 (87.6%)  | 170,433 (85.6%)          | 267,178 (86.3%) |          | 1         | Reference     |
| Need for intensive care unit           | Yes                    | 68,366 (61.9%)  | 45,228 (22.7%)           | 113,594 (36.7%) | <0.001   | 5.523     | 5.235-5.612   |
|                                        | No                     | 42,129 (38.1%)  | 153,923 (77.3%)          | 196,052 (63.3%) |          | 1         | Reference     |
| Need for ventilatory support           | Invasive               | 51,520 (46.6%)  | 12,979 (6.5%)            | 64,499 (20.8%)  | <0.001   | 23.590    | 22.930-24.270 |
|                                        | Non-invasive           | 48,656 (44.0%)  | 124,851 (62.7%)          | 173,507 (56.0%) | <0.001   | 2.316     | 2.262-2.371   |
|                                        | None required          | 10,319 (9.3%)   | 61,321 (30.8%)           | 71,640 (23.1%)  |          | 1         | Reference     |
| Discharge criterion                    | Laboratorial criterion | 104,705 (94.8%) | 190,075 (95.4%)          | 294,780 (95.2%) | <0.001   | 1         | Reference     |
|                                        | Clinical criterion     | 5,790 (5.2%)    | 90,76 (4.6%)             | 14,866 (4.8%)   |          | 1.158     | 1.120-1.198   |

SARS-CoV-2, severe acute respiratory syndrome 2; OR, odds ratio; 95%CI, 95% confidence interval.

We presented the data as the number of individuals (N) and the percentage (%).

We performed the statistical analysis using the  $\chi^2$  test. Alpha=0.05.

Association of the outcome and the patients' characteristics with the SARS-CoV-2 infection during the first year of the COVID-19 pandemic in Brazil – Black individuals.

**Table S12.** Association between the case fatality rate due to SARS-CoV-2 infection in hospitalized Brazilian individuals' regarding to the demographic data.

| <b>Data</b>                          | <b>Category</b>    | <b>Death</b>   | <b>Clinical recovery</b> | <b>Total</b>   | <b>P</b> | <b>OR</b> | <b>95%CI</b> |               |
|--------------------------------------|--------------------|----------------|--------------------------|----------------|----------|-----------|--------------|---------------|
| Sex                                  | Male               | 7,464 (56.2%)  | 10,170 (54.7%)           | 17,634 (55.3%) | 0.011    | 1.060     | 1.014-1.109  |               |
|                                      | Female             | 5,825 (43.8%)  | 8,413 (45.3%)            | 14,238 (44.7%) |          | 1         | Reference    |               |
| Age                                  | <1-year-old        | 9 (0.1%)       | 82 (0.4%)                | 91 (0.3%)      | 0.775    | 1         | Reference    |               |
|                                      | 1 to 12 years old  | 17 (0.1%)      | 193 (1.0%)               | 210 (0.7%)     |          | 0.803     | 0.344-1.874  |               |
|                                      | 13 to 24 years old | 79 (0.6%)      | 470 (2.5%)               | 549 (1.7%)     |          | 0.322     | 1.531        | 0.739-3.172   |
|                                      | 25 to 60 years old | 4,018 (30.2%)  | 10,815 (58.2%)           | 14,833 (46.5%) |          | <0.001    | 3.385        | 1.699-6.743   |
|                                      | 61 to 72 years old | 4,155 (31.3%)  | 4,208 (22.6%)            | 8,363 (26.2%)  |          | <0.001    | 8.996        | 4.514-17.930  |
|                                      | 73 to 85 years old | 3,756 (28.3%)  | 2,326 (12.5%)            | 6,082 (19.1%)  |          | <0.001    | 14.710       | 7.378-29.340  |
|                                      | +85 years old      | 1,255 (9.4%)   | 489 (2.6%)               | 1,744 (5.5%)   |          | <0.001    | 23.380       | 11.660-46.900 |
| Place of residence                   | Urban              | 12,717 (95.7%) | 17,922 (96.4%)           | 30,639 (96.1%) | <0.001   | 1         | Reference    |               |
|                                      | Rural              | 521 (3.9%)     | 592 (3.2%)               | 1,113 (3.5%)   |          | 1.240     | 1.100-1.398  |               |
|                                      | Peri-urban         | 51 (0.4%)      | 69 (0.4%)                | 120 (0.4%)     |          | 0.898     | 1.042        | 0.725-1.497   |
| Lived in a place with a Flu outbreak | Yes                | 2,957 (22.3%)  | 3,789 (20.4%)            | 6,746 (21.2%)  | <0.001   | 1.117     | 1.058-1.180  |               |
|                                      | No                 | 10,332 (77.7%) | 14,794 (79.6%)           | 25,126 (78.8%) |          | 1         | Reference    |               |
| Nosocomial infection                 | Yes                | 505 (3.8%)     | 358 (1.9%)               | 863 (2.7%)     | <0.001   | 2.011     | 1.753-2.307  |               |
|                                      | No                 | 12,784 (96.2%) | 18,225 (98.1%)           | 31,009 (97.3%) |          | 1         | Reference    |               |

SARS-CoV-2, severe acute respiratory syndrome 2; OR, odds ratio; 95%CI, 95% confidence interval.

We presented the data as the number of individuals (N) and the percentage (%).

We performed the statistical analysis using the  $\chi^2$  test. Alpha=0.05.

**Table S13.** Association between the case fatality rate due to SARS-CoV-2 infection in hospitalized Brazilian individuals' regarding to the clinical symptoms.

| Data                   | Category | Death          | Clinical recovery | Total          | P      | OR    | 95%CI       |
|------------------------|----------|----------------|-------------------|----------------|--------|-------|-------------|
| Fever                  | Yes      | 9,194 (69.2%)  | 13,249 (71.3%)    | 22,443 (70.4%) | <0.001 | 0.904 | 0.861-0.949 |
|                        | No       | 4,095 (30.8%)  | 5,334 (28.7%)     | 9,429 (29.6%)  |        |       |             |
| Cough                  | Yes      | 10,379 (78.1%) | 15,148 (81.5%)    | 25,527 (80.1%) | <0.001 | 0.809 | 0.765-0.855 |
|                        | No       | 2,910 (21.9%)  | 3,435 (18.5%)     | 6,345 (19.9%)  |        |       |             |
| Sore throat            | Yes      | 3,736 (28.1%)  | 5,905 (31.8%)     | 9,641 (30.2%)  | <0.001 | 0.840 | 0.800-0.882 |
|                        | No       | 9,553 (71.9%)  | 12,678 (68.2%)    | 22,231 (69.8%) |        |       |             |
| Dyspnea                | Yes      | 11,523 (86.7%) | 14,322 (77.1%)    | 25,845 (81.1%) | <0.001 | 1.941 | 1.827-2.063 |
|                        | No       | 1,766 (13.3%)  | 4,261 (22.9%)     | 6,027 (18.9%)  |        |       |             |
| Respiratory discomfort | Yes      | 10,750 (80.9%) | 12,846 (69.1%)    | 23,596 (74.0%) | <0.001 | 1.891 | 1.793-1.994 |
|                        | No       | 2,539 (19.1%)  | 5,737 (30.9%)     | 8,276 (26.0%)  |        |       |             |
| Oxygen saturation      | <95%     | 11,327 (85.2%) | 12,659 (68.1%)    | 23,986 (75.3%) | <0.001 | 2.702 | 2.552-2.860 |
|                        | ≥95%     | 1,962 (14.8%)  | 5,924 (31.9%)     | 7,886 (24.7%)  |        |       |             |
| Diarrhea               | Yes      | 3,670 (27.6%)  | 5,282 (28.4%)     | 8,952 (28.1%)  | 0.114  | 0.961 | 0.914-1.010 |
|                        | No       | 9,619 (72.4%)  | 13,301 (71.6%)    | 22,920 (71.9%) |        |       |             |
| Vomit                  | Yes      | 2,959 (22.3%)  | 4,204 (22.6%)     | 7,163 (22.5%)  | 0.452  | 0.980 | 0.929-1.033 |
|                        | No       | 10,330 (77.7%) | 14,379 (77.4%)    | 24,709 (77.5%) |        |       |             |
| Abdominal pain         | Yes      | 2,708 (20.4%)  | 3,556 (19.1%)     | 6,264 (19.7%)  | 0.006  | 1.082 | 1.023-1.144 |
|                        | No       | 1,0581 (79.6%) | 15,027 (80.9%)    | 25,608 (80.3%) |        |       |             |
| Fatigue                | Yes      | 5,041 (37.9%)  | 6,543 (35.2%)     | 11,584 (36.3%) | <0.001 | 1.125 | 1.074-1.178 |
|                        | No       | 8,248 (62.1%)  | 12,040 (64.8%)    | 20,288 (63.7%) |        |       |             |
| Loss of smell          | Yes      | 3,255 (24.5%)  | 5,016 (27.0%)     | 8,271 (26.0%)  | <0.001 | 0.877 | 0.834-0.923 |
|                        | No       | 10,034 (75.5%) | 13,567 (73.0%)    | 23,601 (74.0%) |        |       |             |
| Loss of taste          | Yes      | 3,279 (24.7%)  | 5,054 (27.2%)     | 8,333 (26.1%)  | <0.001 | 0.877 | 0.833-0.923 |
|                        | No       | 10,010 (75.3%) | 13,529 (72.8%)    | 23,539 (73.9%) |        |       |             |
| Other symptoms         | Yes      | 5,694 (42.8%)  | 8,623 (46.4%)     | 14,317 (44.9%) | <0.001 | 0.866 | 0.828-0.906 |
|                        | No       | 9,960 (53.6%)  | 7,595 (57.2%)     | 17,555 (55.1%) |        |       |             |

SARS-CoV-2, severe acute respiratory syndrome 2; OR, odds ratio; 95%CI, 95% confidence interval.

We presented the data as the number of individuals (N) and the percentage (%).

We performed the statistical data analysis using the  $\chi^2$  test. Alpha=0.05.

**Table S14.** Association between the case fatality rate due to SARS-CoV-2 infection in hospitalized Brazilian individuals' regarding to the comorbidities.

| Data                        | Category | Death          | Clinical recovery | Total          | P      | OR    | 95%CI       |
|-----------------------------|----------|----------------|-------------------|----------------|--------|-------|-------------|
| Comorbidities (any)         | Yes      | 10,806 (81.3%) | 12,212 (65.7%)    | 23,018 (72.2%) | <0.001 | 2.270 | 2.153-2.394 |
|                             | No       | 2,483 (18.7%)  | 6,371 (34.3%)     | 8,854 (27.8%)  |        | 1     | Reference   |
| Cardiopathy                 | Yes      | 8,091 (60.9%)  | 8,123 (43.7%)     | 16,214 (50.9%) | <0.001 | 2.004 | 1.916-2.097 |
|                             | No       | 5,198 (39.1%)  | 10,460 (56.3%)    | 15,658 (49.1%) |        | 1     | Reference   |
| Hematologic disorder        | Yes      | 195 (1.5%)     | 224 (1.2%)        | 419 (1.3%)     | 0.043  | 1.221 | 1.006-1.481 |
|                             | No       | 13,094 (98.5%) | 18,359 (98.8%)    | 31,453 (98.7%) |        | 1     | Reference   |
| Down syndrome               | Yes      | 48 (0.4%)      | 47 (0.3%)         | 95 (0.3%)      | 0.080  | 1.430 | 0.956-2.139 |
|                             | No       | 13,241 (99.6%) | 18,536 (99.7%)    | 31,777 (99.7%) |        | 1     | Reference   |
| Hepatic disorder            | Yes      | 283 (2.1%)     | 262 (1.4%)        | 545 (1.7%)     | <0.001 | 1.522 | 1.284-1.803 |
|                             | No       | 13,006 (97.9%) | 18,321 (98.6%)    | 31,327 (98.3%) |        | 1     | Reference   |
| Asthma                      | Yes      | 1,083 (8.1%)   | 1,784 (9.6%)      | 2,867 (9.0%)   | <0.001 | 0.836 | 0.772-0.904 |
|                             | No       | 12,206 (91.9%) | 16,799 (90.4%)    | 29,005 (91.0%) |        | 1     | Reference   |
| Diabetes mellitus           | Yes      | 7,104 (53.5%)  | 6,607 (35.6%)     | 13,711 (43.0%) | <0.001 | 2.082 | 1.989-2.179 |
|                             | No       | 6,185 (46.5%)  | 11,976 (64.4%)    | 18,161 (57.0%) |        | 1     | Reference   |
| Neurological disorder       | Yes      | 1,800 (13.5%)  | 1,839 (9.9%)      | 3,639 (11.4%)  | <0.001 | 1.426 | 1.331-1.529 |
|                             | No       | 11,489 (86.5%) | 16,744 (90.1%)    | 28,233 (88.6%) |        | 1     | Reference   |
| Chronic respiratory disease | Yes      | 1,988 (15.0%)  | 2,140 (11.5%)     | 4,128 (13.0%)  | <0.001 | 1.352 | 1.266-1.443 |
|                             | No       | 11,301 (85.0%) | 16,443 (88.5%)    | 27,744 (87.0%) |        | 1     | Reference   |
| Immunosuppressive disorder  | Yes      | 1,324 (10.0%)  | 1,595 (8.6%)      | 2,919 (9.2%)   | <0.001 | 1.179 | 1.092-1.272 |
|                             | No       | 11,965 (90.0%) | 16,988 (91.4%)    | 28,953 (90.8%) |        | 1     | Reference   |
| Renal disease               | Yes      | 2,328 (17.5%)  | 2,359 (12.7%)     | 4,687 (14.7%)  | <0.001 | 1.461 | 1.373-1.554 |
|                             | No       | 10,961 (82.5%) | 16,224 (87.3%)    | 27,185 (85.3%) |        | 1     | Reference   |
| Obesity                     | Yes      | 3,353 (25.2%)  | 3,736 (20.1%)     | 7,089 (22.2%)  | <0.001 | 1.341 | 1.272-1.414 |
|                             | No       | 9,936 (74.8%)  | 14,847 (79.9%)    | 24,783 (77.8%) |        | 1     | Reference   |
| Other comorbidities         | Yes      | 7,075 (53.2%)  | 6,860 (36.9%)     | 13,935 (43.7%) | <0.001 | 1.946 | 1.860-2.036 |
|                             | No       | 6,214 (46.8%)  | 11,723 (63.1%)    | 17,937 (56.3%) |        | 1     | Reference   |

SARS-CoV-2, severe acute respiratory syndrome 2; OR, odds ratio; 95%CI, 95% confidence interval.

We presented the data as the number of individuals (N) and the percentage (%).

We performed the statistical analysis using the  $\chi^2$  test. Alpha=0.05.



**Table S15.** Association between the case fatality rate due to SARS-CoV-2 infection in hospitalized Brazilian individuals' regarding to the antiviral drugs used to treat the infection and the hospitalization data.

| <b>Data</b>                            | <b>Category</b>        | <b>Death</b>   | <b>Clinical recovery</b> | <b>Total</b>   | <b>P</b> | <b>OR</b> | <b>95%CI</b>  |
|----------------------------------------|------------------------|----------------|--------------------------|----------------|----------|-----------|---------------|
| Antiviral drugs to treat the infection | Yes                    | 1,854 (14.0%)  | 3,020 (16.3%)            | 4,874 (15.3%)  | <0.001   | 0.836     | 0.785-0.890   |
|                                        | No                     | 11,435 (86.0%) | 15,563 (83.7%)           | 26,998 (84.7%) |          | 1         | Reference     |
| Need for intensive care unit           | Yes                    | 7,850 (59.1%)  | 4,256 (22.9%)            | 12,106 (38.0%) | <0.001   | 4.859     | 4.628-5.101   |
|                                        | No                     | 5,439 (40.9%)  | 14,327 (77.1%)           | 19,766 (62.0%) |          | 1         | Reference     |
| Need for ventilatory support           | Invasive               | 6,239 (46.9%)  | 1,223 (6.6%)             | 7,462 (23.4%)  | <0.001   | 20.230    | 18.610-21.990 |
|                                        | Non-invasive           | 5,563 (41.9%)  | 11,463 (61.7%)           | 17,026 (53.4%) | <0.001   | 1.925     | 1.803-2.054   |
|                                        | None required          | 1,487 (11.2%)  | 5,897 (31.7%)            | 7,384 (23.2%)  |          | 1         | Reference     |
| Discharge criterion                    | Laboratorial criterion | 12,256 (92.2%) | 17,492 (94.1%)           | 29,748 (93.3%) | <0.001   | 1         | Reference     |
|                                        | Clinical criterion     | 1,033 (7.8%)   | 1,091 (5.9%)             | 2,124 (6.7%)   |          | 1.351     | 1.237-1.476   |

SARS-CoV-2, severe acute respiratory syndrome 2; OR, odds ratio; 95%CI, 95% confidence interval.

We presented the data as the number of individuals (N) and the percentage (%).

We performed the statistical analysis using the  $\chi^2$  test. Alpha=0.05.

Association of the outcome and the patients' characteristics with the SARS-CoV-2 infection during the first year of the COVID-19 pandemic in Brazil – Asian individuals.

**Table S16.** Association between the case fatality rate due to SARS-CoV-2 infection in hospitalized Brazilian individuals' regarding to the demographic data.

| Data                                 | Category           | Death         | Clinical recovery | Total         | P      | OR     | 95%CI       |              |
|--------------------------------------|--------------------|---------------|-------------------|---------------|--------|--------|-------------|--------------|
| Sex                                  | Male               | 1,493 (59.0%) | 2,609 (57.0%)     | 4,102 (57.7%) | 0.111  | 1.083  | 0.982-1.195 |              |
|                                      | Female             | 1,039 (41.0%) | 1,967 (43.0%)     | 3,006 (42.3%) |        | 1      | Reference   |              |
| Age                                  | <1-year-old        | 5 (0.2%)      | 14 (0.3%)         | 19 (0.3%)     | 0.082  | 1      | Reference   |              |
|                                      | 1 to 12 years old  | 2 (0.1%)      | 34 (0.7%)         | 36 (0.5%)     |        | 0.171  | 0.014-1.193 |              |
|                                      | 13 to 24 years old | 9 (0.4%)      | 126 (2.8%)        | 135 (1.9%)    |        | 0.203  | 0.052-0.882 |              |
|                                      | 25 to 60 years old | 574 (22.7%)   | 2,347 (51.3%)     | 2,921 (41.1%) |        | 0.661  | 0.246-1.909 |              |
|                                      | 61 to 72 years old | 693 (27.4%)   | 1,124 (24.6%)     | 1,817 (25.6%) |        | 0.413  | 1.726       | 0.619-4.814  |
|                                      | 73 to 85 years old | 892 (35.2%)   | 754 (16.5%)       | 1,646 (23.2%) |        | 0.028  | 3.312       | 1.188-9.238  |
|                                      | +85 years old      | 357 (14.1%)   | 177 (3.9%)        | 534 (7.5%)    |        | <0.001 | 5.647       | 2.002-15.930 |
| Place of residence                   | Urban              | 2,418 (95.5%) | 4,416 (96.5%)     | 6,834 (96.1%) | 0.057  | 1      | Reference   |              |
|                                      | Rural              | 104 (4.1%)    | 147 (3.2%)        | 251 (3.5%)    |        | 1.299  | 1.000-1.669 |              |
|                                      | Peri-urban         | 10 (0.4%)     | 13 (0.3%)         | 23 (0.3%)     |        | 0.554  | 1.405       | 0.615-3.208  |
| Lived in a place with a Flu outbreak | Yes                | 578 (22.8%)   | 916 (20.0%)       | 1,494 (21.0%) | 0.005  | 1.182  | 1.051-1.330 |              |
|                                      | No                 | 1,954 (77.2%) | 3,660 (80.0%)     | 5,614 (79.0%) |        | 1      | Reference   |              |
| Nosocomial infection                 | Yes                | 60 (2.4%)     | 55 (1.2%)         | 115 (1.6%)    | <0.001 | 1.995  | 1.379-2.886 |              |
|                                      | No                 | 2,472 (97.6%) | 4,521 (98.8%)     | 6,993 (98.4%) |        | 1      | Reference   |              |

SARS-CoV-2, severe acute respiratory syndrome 2; OR, odds ratio; 95%CI, 95% confidence interval.

We presented the data as the number of individuals (N) and the percentage (%).

We performed the statistical analysis using the  $\chi^2$  test. Alpha=0.05.

**Table S17.** Association between the case fatality rate due to SARS-CoV-2 infection in hospitalized Brazilian individuals' regarding to the clinical symptoms.

| Data                   | Category | Death         | Clinical recovery | Total         | P      | OR    | 95%CI       |
|------------------------|----------|---------------|-------------------|---------------|--------|-------|-------------|
| Fever                  | Yes      | 1,793 (70.8%) | 3,358 (73.4%)     | 5,151 (72.5%) | 0.020  | 0.880 | 0.790-0.980 |
|                        | No       | 739 (29.2%)   | 1,218 (26.6%)     | 1,957 (27.5%) |        | 1     | Reference   |
| Cough                  | Yes      | 1,970 (77.8%) | 3,637 (79.5%)     | 5,607 (78.9%) | 0.097  | 0.905 | 0.804-1.018 |
|                        | No       | 562 (22.2%)   | 939 (20.5%)       | 1,501 (21.1%) |        | 1     | Reference   |
| Sore throat            | Yes      | 703 (27.8%)   | 1,501 (32.8%)     | 2,204 (31.0%) | <0.001 | 0.787 | 0.708-0.876 |
|                        | No       | 1,829 (72.2%) | 3,075 (67.2%)     | 4,904 (69.0%) |        | 1     | Reference   |
| Dyspnea                | Yes      | 2,197 (86.8%) | 3,413 (74.6%)     | 5,610 (78.9%) | <0.001 | 2.235 | 1.957-2.552 |
|                        | No       | 335 (13.2%)   | 1,163 (25.4%)     | 1,498 (21.1%) |        | 1     | Reference   |
| Respiratory discomfort | Yes      | 2,034 (80.3%) | 3,020 (66.0%)     | 5,054 (71.1%) | <0.001 | 2.104 | 1.875-2.362 |
|                        | No       | 498 (19.7%)   | 1,556 (34.0%)     | 2,054 (28.9%) |        | 1     | Reference   |
| Oxygen saturation      | <95%     | 2,120 (83.7%) | 2,942 (64.3%)     | 5,062 (71.2%) | <0.001 | 2.858 | 2.531-3.227 |
|                        | ≥95%     | 412 (16.3%)   | 1,634 (35.7%)     | 2,046 (28.8%) |        | 1     | Reference   |
| Diarrhea               | Yes      | 658 (26.0%)   | 1,304 (28.5%)     | 1,962 (27.6%) | 0.023  | 0.881 | 0.790-0.983 |
|                        | No       | 1,874 (74.0%) | 3,272 (71.5%)     | 5,146 (72.4%) |        | 1     | Reference   |
| Vomit                  | Yes      | 489 (19.3%)   | 963 (21.0%)       | 1,452 (20.4%) | 0.083  | 0.898 | 0.795-1.014 |
|                        | No       | 2,043 (80.7%) | 3,613 (79.0%)     | 5,656 (79.6%) |        | 1     | Reference   |
| Abdominal pain         | Yes      | 469 (18.5%)   | 860 (18.8%)       | 1,329 (18.7%) | 0.779  | 0.982 | 0.867-1.113 |
|                        | No       | 2,063 (81.5%) | 3,716 (81.2%)     | 5,779 (81.3%) |        | 1     | Reference   |
| Fatigue                | Yes      | 886 (35.0%)   | 1,542 (33.7%)     | 2,428 (34.2%) | 0.270  | 1.059 | 0.956-1.173 |
|                        | No       | 1,646 (65.0%) | 3,034 (66.3%)     | 4,680 (65.8%) |        | 1     | Reference   |
| Loss of smell          | Yes      | 554 (21.9%)   | 1,287 (28.1%)     | 1,841 (25.9%) | <0.001 | 0.716 | 0.639-0.802 |
|                        | No       | 1,978 (78.1%) | 3,289 (71.9%)     | 5,267 (74.1%) |        | 1     | Reference   |
| Loss of taste          | Yes      | 559 (22.1%)   | 1,300 (28.4%)     | 1,859 (26.2%) | <0.001 | 0.714 | 0.637-0.800 |
|                        | No       | 1,973 (77.9%) | 3,276 (71.6%)     | 5,249 (73.8%) |        | 1     | Reference   |
| Other symptoms         | Yes      | 1,069 (42.2%) | 2,269 (49.6%)     | 3,338 (47.0%) | <0.001 | 0.743 | 0.674-0.819 |
|                        | No       | 1,463 (57.8%) | 2,307 (50.4%)     | 3,770 (53.0%) |        | 1     | Reference   |

SARS-CoV-2, severe acute respiratory syndrome 2; OR, odds ratio; 95%CI, 95% confidence interval.

We presented the data as the number of individuals (N) and the percentage (%).

We performed the statistical data analysis using the  $\chi^2$  test. Alpha=0.05.

**Table S18.** Association between the case fatality rate due to SARS-CoV-2 infection in hospitalized Brazilian individuals' regarding to the comorbidities.

| Data                        | Category | Death         | Clinical recovery | Total         | P      | OR    | 95%CI       |
|-----------------------------|----------|---------------|-------------------|---------------|--------|-------|-------------|
| Comorbidities (any)         | Yes      | 1,962 (77.5%) | 2,766 (60.4%)     | 4,728 (66.5%) | <0.001 | 2.252 | 2.107-2.516 |
|                             | No       | 570 (22.5%)   | 1,810 (39.6%)     | 2,380 (33.5%) |        | 1     | Reference   |
| Cardiopathy                 | Yes      | 1,436 (56.7%) | 1,868 (40.8%)     | 3,304 (46.5%) | <0.001 | 1.899 | 1.722-2.095 |
|                             | No       | 1,096 (43.3%) | 2,708 (59.2%)     | 3,804 (53.5%) |        | 1     | Reference   |
| Hematologic disorder        | Yes      | 31 (1.2%)     | 43 (0.9%)         | 74 (1.0%)     | 0.258  | 1.307 | 0.821-2.079 |
|                             | No       | 2,501 (98.8%) | 4,533 (99.1%)     | 7,034 (99.0%) |        | 1     | Reference   |
| Down syndrome               | Yes      | 12 (0.5%)     | 11 (0.2%)         | 23 (0.3%)     | 0.097  | 1.976 | 0.871-4.485 |
|                             | No       | 2,520 (99.5%) | 4,565 (99.8%)     | 7,085 (99.7%) |        | 1     | Reference   |
| Hepatic disorder            | Yes      | 40 (1.6%)     | 58 (1.3%)         | 98 (1.4%)     | 0.280  | 1.246 | 0.831-1.870 |
|                             | No       | 2,492 (98.4%) | 4,518 (98.7%)     | 7,010 (98.6%) |        | 1     | Reference   |
| Asthma                      | Yes      | 179 (7.1%)    | 413 (9.0%)        | 592 (8.3%)    | 0.004  | 0.767 | 0.639-0.920 |
|                             | No       | 2,353 (92.9%) | 4,163 (91.0%)     | 6,516 (91.7%) |        | 1     | Reference   |
| Diabetes mellitus           | Yes      | 1,238 (48.9%) | 1,554 (4.0%)      | 2,792 (39.3%) | <0.001 | 1.861 | 1.685-2.054 |
|                             | No       | 1,294 (51.1%) | 3,022 (66.0%)     | 4,316 (60.7%) |        | 1     | Reference   |
| Neurological disorder       | Yes      | 308 (12.2%)   | 457 (10.0%)       | 765 (10.8%)   | 0.005  | 1.248 | 1.071-1.455 |
|                             | No       | 2,224 (87.8%) | 4,119 (90.0%)     | 6,343 (89.2%) |        | 1     | Reference   |
| Chronic respiratory disease | Yes      | 311 (12.3%)   | 524 (11.5%)       | 835 (11.7%)   | 0.297  | 1.083 | 0.932-1.257 |
|                             | No       | 2,221 (87.7%) | 4,052 (88.5%)     | 6,273 (88.3%) |        | 1     | Reference   |
| Immunosuppressive disorder  | Yes      | 217 (8.6%)    | 385 (8.4%)        | 602 (8.5%)    | 0.820  | 1.020 | 0.858-1.214 |
|                             | No       | 2,315 (91.4%) | 4,191 (91.6%)     | 6,506 (91.5%) |        | 1     | Reference   |
| Renal disease               | Yes      | 336 (13.3%)   | 543 (11.9%)       | 879 (12.4%)   | 0.085  | 1.136 | 0.982-1.315 |
|                             | No       | 2,196 (86.7%) | 4,033 (88.1%)     | 6,229 (87.6%) |        | 1     | Reference   |
| Obesity                     | Yes      | 494 (19.5%)   | 836 (18.3%)       | 1,330 (18.7%) | 0.199  | 1.068 | 0.946-1.206 |
|                             | No       | 2,038 (80.5%) | 3,740 (81.7%)     | 5,778 (81.3%) |        | 1     | Reference   |
| Other comorbidities         | Yes      | 1,315 (51.9%) | 1,571 (34.3%)     | 2,886 (40.6%) | <0.001 | 2.067 | 1.872-2.282 |
|                             | No       | 1,217 (48.1%) | 3,005 (65.7%)     | 4,222 (59.4%) |        | 1     | Reference   |

SARS-CoV-2, severe acute respiratory syndrome 2; OR, odds ratio; 95%CI, 95% confidence interval.

We presented the data as the number of individuals (N) and the percentage (%).

We performed the statistical analysis using the  $\chi^2$  test. Alpha=0.05.

**Table S19.** Association between the case fatality rate due to SARS-CoV-2 infection in hospitalized Brazilian individuals' regarding to the antiviral drugs used to treat the infection and the hospitalization data.

| <b>Data</b>                            | <b>Category</b>        | <b>Death</b>  | <b>Clinical recovery</b> | <b>Total</b>  | <b>P</b> | <b>OR</b> | <b>95%CI</b>  |
|----------------------------------------|------------------------|---------------|--------------------------|---------------|----------|-----------|---------------|
| Antiviral drugs to treat the infection | Yes                    | 365 (14.4%)   | 617 (13.5%)              | 982 (13.8%)   | 0.275    | 1.081     | 0.940-1.243   |
|                                        | No                     | 2,167 (85.6%) | 3,959 (86.5%)            | 6,126 (86.2%) |          | 1         | Reference     |
| Need for intensive care unit           | Yes                    | 1,584 (62.6%) | 988 (21.6%)              | 2,572 (36.2%) | <0.001   | 6.068     | 5.453-6.753   |
|                                        | No                     | 948 (37.4%)   | 3,588 (78.4%)            | 4,536 (63.8%) |          | 1         | Reference     |
| Need for ventilatory support           | Invasive               | 1,156 (45.7%) | 270 (5.9%)               | 1,426 (20.1%) | <0.001   | 25.710    | 21.290-31.040 |
|                                        | Non-invasive           | 1,127 (44.5%) | 2,811 (61.4%)            | 3,938 (55.4%) | <0.001   | 2.407     | 2.070-2.799   |
|                                        | None required          | 249 (9.8%)    | 1,495 (32.7%)            | 1,744 (24.5%) |          | 1         | Reference     |
| Discharge criterion                    | Laboratorial criterion | 2,393 (94.5%) | 4,330 (94.6%)            | 6,723 (94.6%) | 0.839    | 1         | Reference     |
|                                        | Clinical criterion     | 139 (5.5%)    | 246 (5.4%)               | 385 (5.4%)    |          | 1.022     | 0.826-1.266   |

SARS-CoV-2, severe acute respiratory syndrome 2; OR, odds ratio; 95%CI, 95% confidence interval.

We presented the data as the number of individuals (N) and the percentage (%).

We performed the statistical analysis using the  $\chi^2$  test. Alpha=0.05.

Association of the outcome and the patients' characteristics with the SARS-CoV-2 infection during the first year of the COVID-19 pandemic in Brazil – multiracial backgrounds individuals.

**Table S20.** Association between the case fatality rate due to SARS-CoV-2 infection in hospitalized Brazilian individuals' regarding to the demographic data.

| Data                                 | Category           | Death          | Clinical recovery | Total           | P      | OR     | 95%CI         |
|--------------------------------------|--------------------|----------------|-------------------|-----------------|--------|--------|---------------|
| Sex                                  | Male               | 52,842 (57.4%) | 79,008 (55.2%)    | 131,850 (56.1%) | <0.001 | 1.093  | 1.075-1.111   |
|                                      | Female             | 39,207 (42.6%) | 64,051 (44.8%)    | 103,258 (43.9%) |        | 1      | Reference     |
| Age                                  | <1-year-old        | 206 (0.2%)     | 1,400 (1.0%)      | 1,606 (0.7%)    |        | 1      | Reference     |
|                                      | 1 to 12 years old  | 165 (0.2%)     | 3,069 (2.1%)      | 3,234 (1.4%)    | <0.001 | 0.365  | 0.295-0.453   |
|                                      | 13 to 24 years old | 698 (0.8%)     | 4,760 (3.3%)      | 5,458 (2.3%)    | 0.998  | 0.997  | 0.844-1.177   |
|                                      | 25 to 60 years old | 27,442 (29.8%) | 81,042 (56.6%)    | 108,484 (46.1%) | <0.001 | 2.301  | 1.987-2.665   |
|                                      | 61 to 72 years old | 27,379 (29.7%) | 30,715 (21.5%)    | 58,094 (24.7%)  | <0.001 | 6.058  | 5.229-7.018   |
|                                      | 73 to 85 years old | 26904 (29.2%)  | 17981 (12.6%)     | 44,885 (19.1%)  | <0.001 | 10.170 | 8.774-11.780  |
|                                      | +85 years old      | 9,255 (10.1%)  | 4,092 (2.9%)      | 13,347 (5.7%)   | <0.001 | 15.370 | 13.220-17.870 |
| Place of residence                   | Urban              | 85,743 (93.1%) | 135,253 (94.5%)   | 220,996 (94.0%) |        | 1      | Reference     |
|                                      | Rural              | 5,935 (6.4%)   | 7,379 (5.2%)      | 13,314 (5.7%)   | <0.001 | 1.269  | 1.225-1.314   |
|                                      | Peri-urban         | 371 (0.4%)     | 427 (0.3%)        | 798 (0.3%)      | <0.001 | 1.371  | 1.192-1.575   |
| Lived in a place with a Flu outbreak | Yes                | 24,546 (26.7%) | 35,202 (24.6%)    | 59,748 (25.4%)  | <0.001 | 1.114  | 1.093-1.135   |
|                                      | No                 | 6,7503 (73.3%) | 107,857 (75.4%)   | 175,360 (74.6%) |        | 1      | Reference     |
| Nosocomial infection                 | Yes                | 2,372 (2.6%)   | 2,013 (1.4%)      | 4,385 (1.9%)    | <0.001 | 1.853  | 1.745-1.968   |
|                                      | No                 | 89,677 (97.4%) | 141,046 (98.6%)   | 230,723 (98.1%) |        | 1      | Reference     |

SARS-CoV-2, severe acute respiratory syndrome 2; OR, odds ratio; 95%CI, 95% confidence interval.

We presented the data as the number of individuals (N) and the percentage (%).

We performed the statistical analysis using the  $\chi^2$  test. Alpha=0.05.

**Table S21.** Association between the case fatality rate due to SARS-CoV-2 infection in hospitalized Brazilian individuals' regarding to the clinical symptoms.

| Data                   | Category | Death          | Clinical recovery | Total           | P      | OR    | 95%CI       |
|------------------------|----------|----------------|-------------------|-----------------|--------|-------|-------------|
| Fever                  | Yes      | 66,158 (71.9%) | 105,224 (73.6%)   | 171,382 (72.9%) | <0.001 | 0.919 | 0.902-0.936 |
|                        | No       | 25,891 (28.1%) | 37,835 (26.4%)    | 63,726 (27.1%)  |        | 1     | Reference   |
| Cough                  | Yes      | 72,360 (78.6%) | 116,273 (81.3%)   | 188,633 (80.2%) | <0.001 | 0.847 | 0.829-0.864 |
|                        | No       | 19,689 (21.4%) | 26,786 (18.7%)    | 46,475 (19.8%)  |        | 1     | Reference   |
| Sore throat            | Yes      | 26,729 (29.0%) | 46,347 (32.4%)    | 73,076 (31.1%)  | <0.001 | 0.854 | 0.839-0.869 |
|                        | No       | 65,320 (71.0%) | 96,712 (67.6%)    | 162,032 (68.9%) |        | 1     | Reference   |
| Dyspnea                | Yes      | 81,176 (88.2%) | 110,180 (77.0%)   | 191,356 (81.4%) | <0.001 | 2.228 | 2.176-2.281 |
|                        | No       | 10,873 (11.8%) | 32,879 (23.0%)    | 43,752 (18.6%)  |        | 1     | Reference   |
| Respiratory discomfort | Yes      | 75,257 (81.8%) | 98,129 (68.6%)    | 173,386 (73.7%) | <0.001 | 2.052 | 2.011-2.094 |
|                        | No       | 16,792 (18.2%) | 44,930 (31.4%)    | 61,722 (26.3%)  |        | 1     | Reference   |
| Oxygen saturation      | <95%     | 76,627 (83.2%) | 90,967 (63.6%)    | 167,594 (71.3%) | <0.001 | 2.845 | 2.788-2.904 |
|                        | ≥95%     | 15,422 (16.8%) | 52,092 (36.4%)    | 67,514 (28.7%)  |        | 1     | Reference   |
| Diarrhea               | Yes      | 21,882 (23.8%) | 37,197 (26.0%)    | 59,079 (25.1%)  | <0.001 | 0.888 | 0.871-0.905 |
|                        | No       | 70,167 (76.2%) | 105,862 (74.0%)   | 176,029 (74.9%) |        | 1     | Reference   |
| Vomit                  | Yes      | 17,021 (18.5%) | 28,792 (20.1%)    | 45,813 (19.5%)  | <0.001 | 0.900 | 0.882-0.920 |
|                        | No       | 75,028 (81.5%) | 114,267 (79.9%)   | 189,295 (80.5%) |        | 1     | Reference   |
| Abdominal pain         | Yes      | 15,748 (17.1%) | 24,209 (16.9%)    | 39,957 (17.0%)  | 0.242  | 1.013 | 0.991-1.036 |
|                        | No       | 76,301 (82.9%) | 118,850 (83.1%)   | 195,151 (83.0%) |        | 1     | Reference   |
| Fatigue                | Yes      | 31,478 (34.2%) | 44,796 (31.3%)    | 76,274 (32.4%)  | <0.001 | 1.140 | 1.120-1.160 |
|                        | No       | 60,571 (65.8%) | 98,263 (68.7%)    | 158,834 (67.6%) |        | 1     | Reference   |
| Loss of smell          | Yes      | 20,119 (21.9%) | 36,873 (25.8%)    | 56,992 (24.2%)  | <0.001 | 0.806 | 0.790-0.821 |
|                        | No       | 71,930 (78.1%) | 106,186 (74.2%)   | 178,116 (75.8%) |        | 1     | Reference   |
| Loss of taste          | Yes      | 20,087 (21.8%) | 37,117 (25.9%)    | 57,204 (24.3%)  | <0.001 | 0.797 | 0.781-0.813 |
|                        | No       | 71,962 (78.2%) | 105,942 (74.1%)   | 177,904 (75.7%) |        | 1     | Reference   |
| Other symptoms         | Yes      | 36,569 (39.7%) | 66,161 (46.2%)    | 102,730 (43.7%) | <0.001 | 0.766 | 0.753-0.779 |
|                        | No       | 55,480 (60.3%) | 76,898 (53.8%)    | 132,378 (56.3%) |        | 1     | Reference   |

SARS-CoV-2, severe acute respiratory syndrome 2; OR, odds ratio; 95%CI, 95% confidence interval.

We presented the data as the number of individuals (N) and the percentage (%).

We performed the statistical data analysis using the  $\chi^2$  test. Alpha=0.05.

**Table S22.** Association between the case fatality rate due to SARS-CoV-2 infection in hospitalized Brazilian individuals' regarding to the comorbidities.

| Data                        | Category | Death          | Clinical recovery | Total           | P      | OR    | 95%CI       |
|-----------------------------|----------|----------------|-------------------|-----------------|--------|-------|-------------|
| Comorbidities (any)         | Yes      | 68,021 (73.9%) | 81,052 (56.7%)    | 149,073 (63.4%) | <0.001 | 2.166 | 2.127-2.205 |
|                             | No       | 24,028 (26.1%) | 62,007 (43.3%)    | 86,035 (36.6%)  |        | 1     | Reference   |
| Cardiopathy                 | Yes      | 47,909 (52.0%) | 50,615 (35.4%)    | 98,524 (41.9%)  | <0.001 | 1.982 | 1.949-2.106 |
|                             | No       | 44,140 (48.0%) | 92,444 (64.6%)    | 136,584 (58.1%) |        | 1     | Reference   |
| Hematologic disorder        | Yes      | 1,045 (1.1%)   | 1,182 (0.8%)      | 2,227 (0.9%)    | <0.001 | 1.378 | 1.268-1.499 |
|                             | No       | 91,004 (98.9%) | 141,877 (99.2%)   | 232,881 (99.1%) |        | 1     | Reference   |
| Down syndrome               | Yes      | 319 (0.3%)     | 331 (0.2%)        | 650 (0.3%)      | <0.001 | 1.500 | 1.286-1.749 |
|                             | No       | 91,730 (99.7%) | 142,728 (99.8%)   | 234,458 (99.7%) |        | 1     | Reference   |
| Hepatic disorder            | Yes      | 1,521 (1.7%)   | 1,646 (1.2%)      | 3,167 (1.3%)    | <0.001 | 1.443 | 1.346-1.548 |
|                             | No       | 90,528 (98.3%) | 141,413 (98.8%)   | 231,941 (98.7%) |        | 1     | Reference   |
| Asthma                      | Yes      | 5,345 (5.8%)   | 11,156 (7.8%)     | 1,6501 (7.0%)   | <0.001 | 0.729 | 0.705-0.754 |
|                             | No       | 86,704 (94.2%) | 131,903 (92.2%)   | 218,607 (93.0%) |        | 1     | Reference   |
| Diabetes mellitus           | Yes      | 42,393 (46.1%) | 42,743 (29.9%)    | 85,136 (36.2%)  | <0.001 | 2.004 | 1.969-2.038 |
|                             | No       | 49,656 (53.9%) | 100,316 (70.1%)   | 149,972 (63.8%) |        | 1     | Reference   |
| Neurological disorder       | Yes      | 8,987 (9.8%)   | 11,819 (8.3%)     | 20,806 (8.8%)   | <0.001 | 1.201 | 1.167-1.236 |
|                             | No       | 83,062 (90.2%) | 131,240 (91.7%)   | 214,302 (91.2%) |        | 1     | Reference   |
| Chronic respiratory disease | Yes      | 9,876 (10.7%)  | 13,212 (9.2%)     | 23,088 (9.8%)   | <0.001 | 1.181 | 1.149-1.214 |
|                             | No       | 82,173 (89.3%) | 129,847 (90.8%)   | 212,020 (90.2%) |        | 1     | Reference   |
| Immunosuppressive disorder  | Yes      | 6,422 (7.0%)   | 9,992 (7.0%)      | 16,414 (7.0%)   | 0.942  | 0.999 | 0.967-1.032 |
|                             | No       | 85,627 (93.0%) | 133,067 (93.0%)   | 218,694 (93.0%) |        | 1     | Reference   |
| Renal disease               | Yes      | 11,214 (12.2%) | 14,134 (9.9%)     | 25,348 (10.8%)  | <0.001 | 1.265 | 1.233-1.299 |
|                             | No       | 80,835 (87.8%) | 128,925 (90.1%)   | 209,760 (89.2%) |        | 1     | Reference   |
| Obesity                     | Yes      | 17,722 (19.3%) | 22,249 (15.6%)    | 39,971 (17.0%)  | <0.001 | 1.295 | 1.267-1.323 |
|                             | No       | 74,327 (80.7%) | 120,810 (84.4%)   | 195,137 (83.0%) |        | 1     | Reference   |
| Other comorbidities         | Yes      | 44,955 (48.8%) | 46,716 (32.7%)    | 91,671 (39.0%)  | <0.001 | 1.969 | 1.935-2.002 |
|                             | No       | 47,094 (51.2%) | 96,343 (67.3%)    | 143,437 (61.0%) |        | 1     | Reference   |

SARS-CoV-2, severe acute respiratory syndrome 2; OR, odds ratio; 95%CI, 95% confidence interval.

We presented the data as the number of individuals (N) and the percentage (%).

We performed the statistical analysis using the  $\chi^2$  test. Alpha=0.05.



**Table S23.** Association between the case fatality rate due to SARS-CoV-2 infection in hospitalized Brazilian individuals' regarding to the antiviral drugs used to treat the infection and the hospitalization data.

| <b>Data</b>                            | <b>Category</b>        | <b>Death</b>   | <b>Clinical recovery</b> | <b>Total</b>    | <b>P</b> | <b>OR</b> | <b>95%CI</b>  |
|----------------------------------------|------------------------|----------------|--------------------------|-----------------|----------|-----------|---------------|
| Antiviral drugs to treat the infection | Yes                    | 11,588 (12.6%) | 17,973 (12.6%)           | 29,561 (12.6%)  | 0.855    | 1.002     | 0.978-1.208   |
|                                        | No                     | 80,461 (87.4%) | 125,086 (87.4%)          | 205,547 (87.4%) |          | 1         | Reference     |
| Need for intensive care unit           | Yes                    | 53,753 (58.4%) | 29,586 (20.7%)           | 83,339 (35.4%)  | <0.001   | 5.383     | 5.286-5.483   |
|                                        | No                     | 38,296 (41.6%) | 113,473 (79.3%)          | 151,769 (64.6%) |          | 1         | Reference     |
| Need for ventilatory support           | Invasive               | 44,254 (48.1%) | 8,513 (6.0%)             | 52,767 (22.4%)  | <0.001   | 23.030    | 22.320-23.760 |
|                                        | Non-invasive           | 36,796 (40.0%) | 85,819 (60.0%)           | 122,615 (52.2%) | <0.001   | 1.899     | 1.854-1.946   |
|                                        | None required          | 10,999 (11.9%) | 48,727 (34.1%)           | 59,726 (25.4%)  |          | 1         | Reference     |
| Discharge criterion                    | Laboratorial criterion | 83,980 (91.2%) | 131,652 (92.0%)          | 215,632 (91.7%) | <0.001   | 1         | Reference     |
|                                        | Clinical criterion     | 8,069 (8.8%)   | 11,407 (8.0%)            | 19,476 (8.3%)   |          | 1.109     | 1.076-1.142   |

SARS-CoV-2, severe acute respiratory syndrome 2; OR, odds ratio; 95%CI, 95% confidence interval.

We presented the data as the number of individuals (N) and the percentage (%).

We performed the statistical analysis using the  $\chi^2$  test. Alpha=0.05.

Association of the outcome and the patients' characteristics with the SARS-CoV-2 infection during the first year of the COVID-19 pandemic in Brazil – Indigenous individuals.

**Table S24.** Association between the case fatality rate due to SARS-CoV-2 infection in hospitalized Brazilian individuals' regarding to the demographic data.

| <b>Data</b>                          | <b>Category</b>    | <b>Death</b> | <b>Clinical recovery</b> | <b>Total</b>  | <b>P</b> | <b>OR</b> | <b>95%CI</b> |              |
|--------------------------------------|--------------------|--------------|--------------------------|---------------|----------|-----------|--------------|--------------|
| Sex                                  | Male               | 284 (36.7%)  | 548 (47.7%)              | 832 (43.3%)   | <0.001   | 1.573     | 1.305-1.895  |              |
|                                      | Female             | 489 (63.3%)  | 600 (52.3%)              | 1,089 (56.7%) |          | 1         | Reference    |              |
| Age                                  | <1-year-old        | 20 (2.6%)    | 53 (4.6%)                | 73 (3.8%)     | 0.031    | 1         | Reference    |              |
|                                      | 1 to 12 years old  | 12 (1.6%)    | 81 (7.1%)                | 93 (4.8%)     |          | 0.393     | 0.177-0.869  |              |
|                                      | 13 to 24 years old | 18 (2.3%)    | 95 (8.3%)                | 113 (5.9%)    |          | 0.088     | 0.502        | 0.244-1.032  |
|                                      | 25 to 60 years old | 219 (28.3%)  | 567 (49.4%)              | 786 (40.9%)   |          | 0.960     | 1.204        | 0.598-1.752  |
|                                      | 61 to 72 years old | 193 (25.0%)  | 179 (15.6%)              | 372 (19.4%)   |          | <0.001    | 2.857        | 1.643-4.968  |
|                                      | 73 to 85 years old | 221 (28.6%)  | 131 (11.4%)              | 352 (18.3%)   |          | <0.001    | 4.471        | 2.559-7.810  |
|                                      | +85 years old      | 90 (11.6%)   | 42 (3.7%)                | 132 (6.9%)    |          | <0.001    | 5.679        | 3.020-10.680 |
| Place of residence                   | Urban              | 375 (48.5%)  | 582 (50.7%)              | 957 (49.8%)   | 0.319    | 1         | Reference    |              |
|                                      | Rural              | 393 (50.8%)  | 553 (48.2%)              | 946 (49.2%)   |          | 1.103     | 0.918-1.325  |              |
|                                      | Peri-urban         | 5 (0.6%)     | 13 (1.1%)                | 18 (0.9%)     |          | 0.460     | 0.597        | 0.211-1.688  |
| Lived in a place with a Flu outbreak | Yes                | 318 (41.1%)  | 387 (33.7%)              | 705 (36.7%)   | 0.001    | 1.374     | 1.138-1.659  |              |
|                                      | No                 | 455 (58.9%)  | 761 (66.3%)              | 1,216 (63.3%) |          | 1         | Reference    |              |
| Nosocomial infection                 | Yes                | 12 (1.6%)    | 14 (1.2%)                | 26 (1.4%)     | 0.536    | 1.277     | 0.588-2.776  |              |
|                                      | No                 | 761 (98.4%)  | 1,134 (98.8%)            | 1,895 (98.6%) |          | 1         | Reference    |              |

SARS-CoV-2, severe acute respiratory syndrome 2; OR, odds ratio; 95%CI, 95% confidence interval.

We presented the data as the number of individuals (N) and the percentage (%).

We performed the statistical analysis using the  $\chi^2$  test. Alpha=0.05.

**Table S25.** Association between the case fatality rate due to SARS-CoV-2 infection in hospitalized Brazilian individuals' regarding to the clinical symptoms.

| Data                   | Category | Death       | Clinical recovery | Total         | P      | OR    | 95%CI       |
|------------------------|----------|-------------|-------------------|---------------|--------|-------|-------------|
| Fever                  | Yes      | 633 (81.9%) | 887 (77.3%)       | 1,520 (79.1%) | 0.014  | 1.330 | 1.058-1.673 |
|                        | No       | 140 (18.1%) | 261 (22.7%)       | 401 (20.9%)   |        | 1     | Reference   |
| Cough                  | Yes      | 667 (86.3%) | 951 (82.8%)       | 1,618 (84.2%) | 0.042  | 1.303 | 1.009-1.684 |
|                        | No       | 106 (13.7%) | 197 (17.2%)       | 303 (15.8%)   |        | 1     | Reference   |
| Sore throat            | Yes      | 310 (40.1%) | 445 (38.8%)       | 755 (39.3%)   | 0.555  | 1.058 | 0.878-1.275 |
|                        | No       | 463 (59.9%) | 703 (61.2%)       | 1,166 (60.7%) |        | 1     | Reference   |
| Dyspnea                | Yes      | 707 (91.5%) | 836 (72.8%)       | 1,543 (80.3%) | <0.001 | 3.998 | 3.010-5.310 |
|                        | No       | 66 (8.5%)   | 312 (27.2%)       | 378 (19.7%)   |        | 1     | Reference   |
| Respiratory discomfort | Yes      | 643 (83.2%) | 797 (69.4%)       | 1,440 (75.0%) | <0.001 | 2.178 | 1.737-2.732 |
|                        | No       | 130 (16.8%) | 351 (30.6%)       | 481 (25.0%)   |        | 1     | Reference   |
| Oxygen saturation      | <95%     | 662 (85.6%) | 663 (57.8%)       | 1,325 (69.0%) | <0.001 | 4.363 | 3.457-5.505 |
|                        | ≥95%     | 111 (14.4%) | 485(42.2%)        | 596 (31.0%)   |        | 1     | Reference   |
| Diarrhea               | Yes      | 151 (19.5%) | 297 (25.9%)       | 448 (23.3%)   | 0.001  | 0.696 | 0.557-0.868 |
|                        | No       | 622 (80.5%) | 851 (74.1%)       | 1,473 (76.7%) |        | 1     | Reference   |
| Vomit                  | Yes      | 113 (14.6%) | 259 (22.6%)       | 372 (19.4%)   | <0.001 | 0.588 | 0.461-0.749 |
|                        | No       | 660 (85.4%) | 889 (77.4%)       | 1,549 (80.6%) |        | 1     | Reference   |
| Abdominal pain         | Yes      | 135 (17.5%) | 215 (18.7%)       | 350 (18.2%)   | 0.508  | 0.918 | 0.724-1.165 |
|                        | No       | 638 (82.5%) | 933 (81.3%)       | 1,571 (81.8%) |        | 1     | Reference   |
| Fatigue                | Yes      | 273 (35.3%) | 376 (32.8%)       | 649 (33.8%)   | 0.244  | 1.121 | 0.925-1.359 |
|                        | No       | 500 (64.7%) | 772 (67.2%)       | 1,272 (66.2%) |        | 1     | Reference   |
| Loss of smell          | Yes      | 161 (20.8%) | 287 (25.0%)       | 448 (23.3%)   | 0.034  | 0.789 | 0.634-0.983 |
|                        | No       | 612 (79.2%) | 861 (75.0%)       | 1,473 (76.7%) |        | 1     | Reference   |
| Loss of taste          | Yes      | 163 (21.1%) | 289 (25.2%)       | 452 (23.5%)   | <0.001 | 0.794 | 0.639-0.988 |
|                        | No       | 610 (78.9%) | 859 (74.8%)       | 1,469 (76.5%) |        | 1     | Reference   |
| Other symptoms         | Yes      | 244 (31.6%) | 491 (42.8%)       | 735 (38.3%)   | <0.001 | 0.617 | 0.510-0.748 |
|                        | No       | 529 (68.4%) | 657 (57.2%)       | 1,186 (61.7%) |        | 1     | Reference   |

SARS-CoV-2, severe acute respiratory syndrome 2; OR, odds ratio; 95%CI, 95% confidence interval.

We presented the data as the number of individuals (N) and the percentage (%).

We performed the statistical data analysis using the  $\chi^2$  test. Alpha=0.05.

**Table S26.** Association between the case fatality rate due to SARS-CoV-2 infection in hospitalized Brazilian individuals' regarding to the comorbidities.

| Data                        | Category | Death       | Clinical recovery | Total         | P      | OR    | 95%CI        |
|-----------------------------|----------|-------------|-------------------|---------------|--------|-------|--------------|
| Comorbidities (any)         | Yes      | 453 (58.6%) | 485 (42.2%)       | 938 (48.8%)   | <0.001 | 1.935 | 1.608-2.328  |
|                             | No       | 320 (41.4%) | 663 (57.8%)       | 983 (51.2%)   |        | 1     | Reference    |
| Cardiopathy                 | Yes      | 311 (40.2%) | 279 (24.3%)       | 590 (30.7%)   | <0.001 | 2.097 | 1.722-2.554  |
|                             | No       | 462 (59.8%) | 869 (75.7%)       | 1,331 (69.3%) |        | 1     | Reference    |
| Hematologic disorder        | Yes      | 7 (0.9%)    | 5 (0.4%)          | 12 (0.6%)     | 0.200  | 2.089 | 0.661-6.606  |
|                             | No       | 766 (99.1%) | 1,143 (99.6%)     | 1,909 (99.4%) |        | 1     | Reference    |
| Down syndrome               | Yes      | 5 (0.6%)    | 2 (0.2%)          | 7 (0.4%)      | 0.125* | 3.728 | 0.608-39.240 |
|                             | No       | 768 (99.4%) | 1,146 (99.8%)     | 1,914 (99.6%) |        | 1     | Reference    |
| Hepatic disorder            | Yes      | 10 (1.3%)   | 7 (0.6%)          | 17 (0.9%)     | 0.117  | 2.136 | 0.810-5.636  |
|                             | No       | 763 (98.7%) | 1,141 (99.4%)     | 1,904 (99.1%) |        | 1     | Reference    |
| Asthma                      | Yes      | 29 (3.8%)   | 81 (7.1%)         | 110 (5.7%)    | 0.002  | 0.514 | 0.337-0.793  |
|                             | No       | 744 (96.2%) | 1,067 (92.9%)     | 1,811 (94.3%) |        | 1     | Reference    |
| Diabetes mellitus           | Yes      | 272 (35.2%) | 241 (21.0%)       | 513 (26.7%)   | <0.001 | 2.043 | 1.665-2.508  |
|                             | No       | 501 (64.8%) | 907 (79.0%)       | 1,408 (73.3%) |        | 1     | Reference    |
| Neurological disorder       | Yes      | 35 (4.5%)   | 85 (7.4%)         | 120 (6.2%)    | 0.011  | 0.593 | 0.396-0.889  |
|                             | No       | 738 (95.5%) | 1,063 (92.6%)     | 1,801 (93.8%) |        | 1     | Reference    |
| Chronic respiratory disease | Yes      | 47 (6.1%)   | 88 (7.7%)         | 135 (7.0%)    | 0.183  | 0.780 | 0.541-1.125  |
|                             | No       | 726 (93.9%) | 1,060 (92.3%)     | 1,786 (93.0%) |        | 1     | Reference    |
| Immunosuppressive disorder  | Yes      | 32 (4.1%)   | 63 (5.5%)         | 95 (4.9%)     | 0.181  | 0.744 | 0.481-1.150  |
|                             | No       | 741 (95.9%) | 1,085 (94.5%)     | 1,826 (95.1%) |        | 1     | Reference    |
| Renal disease               | Yes      | 59 (7.6%)   | 97 (8.4%)         | 156 (8.1%)    | 0.520  | 0.895 | 0.639-1.254  |
|                             | No       | 714 (92.4%) | 1,051 (91.6%)     | 1,765 (91.9%) |        | 1     | Reference    |
| Obesity                     | Yes      | 93 (12.0%)  | 144 (12.5%)       | 237 (12.3%)   | 0.738  | 0.954 | 0.722-1.260  |
|                             | No       | 680 (88.0%) | 1,004 (87.5%)     | 1,684 (87.7%) |        | 1     | Reference    |
| Other comorbidities         | Yes      | 287 (37.1%) | 290 (25.3%)       | 577 (30.0%)   | <0.001 | 1.747 | 1.434-2.129  |
|                             | No       | 486 (62.9%) | 858 (74.7%)       | 1,344 (70.0%) |        | 1     | Reference    |

SARS-CoV-2, severe acute respiratory syndrome 2; OR, odds ratio; 95%CI, 95% confidence interval.

We presented the data as the number of individuals (N) and the percentage (%).

We performed the statistical analysis using the  $\chi^2$  test (and \* the Fisher Exact test). Alpha=0.05.

**Table S27.** Association between the case fatality rate due to SARS-CoV-2 infection in hospitalized Brazilian individuals' regarding to the antiviral drugs used to treat the infection and the hospitalization data.

| <b>Data</b>                            | <b>Category</b>        | <b>Death</b> | <b>Clinical recovery</b> | <b>Total</b>  | <b>P</b> | <b>OR</b> | <b>95%CI</b>  |             |
|----------------------------------------|------------------------|--------------|--------------------------|---------------|----------|-----------|---------------|-------------|
| Antiviral drugs to treat the infection | Yes                    | 108 (14.0%)  | 160 (13.9%)              | 268 (14.0%)   | 0.983    | 1.003     | 0.771-1.305   |             |
|                                        | No                     | 665 (86.0%)  | 988 (86.1%)              | 1,653 (86.0%) |          | 1         | Reference     |             |
| Need for intensive care unit           | Yes                    | 317 (41.0%)  | 139 (12.1%)              | 456 (23.7%)   | <0.001   | 5.046     | 4.017-6.338   |             |
|                                        | No                     | 456 (59.0%)  | 1,009 (87.9%)            | 1,465 (76.3%) |          | 1         | Reference     |             |
| Need for ventilatory support           | Invasive               | 309 (40.0%)  | 56 (4.9%)                | 365 (19.0%)   | <0.001   | 22.070    | 15.600-31.230 |             |
|                                        | Non-invasive           | 342 (44.2%)  | 604 (52.6%)              | 946 (49.2%)   |          | <0.001    | 2.265         | 1.784-2.875 |
|                                        | None required          | 122 (15.8%)  | 488 (42.5%)              | 610 (31.8%)   |          | 1         | Reference     |             |
| Discharge criterion                    | Laboratorial criterion | 695 (89.9%)  | 1,022 (89.0%)            | 1,717 (89.4%) | 0.537    | 1         | Reference     |             |
|                                        | Clinical criterion     | 78 (10.1%)   | 126 (11.0%)              | 204 (10.6%)   |          | 0.910     | 0.678-1.227   |             |

SARS-CoV-2, severe acute respiratory syndrome 2; OR, odds ratio; 95%CI, 95% confidence interval.

We presented the data as the number of individuals (N) and the percentage (%).

We performed the statistical analysis using the  $\chi^2$  test. Alpha=0.05.
